# Supplementary material for: Diverse lytic bacteriophages from India reveal genomic signatures and therapeutic potential against MDR Escherichia coli
Source: Research Square preprint supplement (doi:10.21203/rs.3.rs-6564877/v1), 2025-05-14
Supplement: Supplementary file 1 [file 45d1aace899faaaf0d5dd4e6.xlsx]

## Sheet: Sheet1
GenBank_accession	GenBank_ID	num_proteins	GCpercent	length_nuc	GenBank_organism_entry	ncbitax.species	GenBank_specific_host_entry	Specific_host_species_checked	Specific_host_genus_checked	Specific_host_family_checked	Order	Family	Subfamily	Genus	ICTV.species	Host_domain	ICTV.species.and.accession	Genome Composition
JN673056	363453820	209	44.5329	156628	Escherichia phage PhaxI	Escherichia phage PhaxI	Escherichia coli O157:H7	Escherichia coli	Escherichia	Enterobacteriaceae	Caudovirales	Myoviridae		Viunalikevirus	Escherichia phage PhaxI	Bacteria	Escherichia phage PhaxI (JN673056)	dsDNA
KM458633	699022731	75	56.5108	59578	Salmonella phage Chi	Salmonella phage Chi	Salmonella enterica	Salmonella enterica	Salmonella	Enterobacteriaceae	Caudovirales	Siphoviridae		Chilikevirus	Salmonella phage Chi	Bacteria	Salmonella phage Chi (KM458633)	dsDNA
AF493143	29243560	42	57.4159	37359	Pseudomonad phage gh-1	Pseudomonad phage gh-1	Pseudomonas putida	Pseudomonas putida	Pseudomonas	Pseudomonadaceae	Caudovirales	Podoviridae	Autographivirinae	T7likevirus	Pseudomonad phage gh-1	Bacteria	Pseudomonad phage gh-1 (AF493143)	dsDNA
JQ007353	371767622	61	49.6448	43221	Salmonella phage SE2	Salmonella phage SE2	Salmonella enterica serovar Enteritidis	Salmonella enterica	Salmonella	Enterobacteriaceae	Caudovirales	Siphoviridae		Jerseylikevirus	Salmonella phage SE2	Bacteria	Salmonella phage SE2 (JQ007353)	dsDNA
EU877232	216262944	140	38.8943	88487	Escherichia phage wV8	Escherichia phage wV8	Escherichia coli O157:H7	Escherichia coli	Escherichia	Enterobacteriaceae	Caudovirales	Myoviridae		Felixounalikevirus	Escherichia phage wV8	Bacteria	Escherichia phage wV8 (EU877232)	dsDNA
EU710883	199580526	118	43.8127	84576	Erwinia phage phiEa21-4	Erwinia phage phiEa21-4	Erwinia amylovora	Erwinia amylovora	Erwinia	Enterobacteriaceae	Caudovirales	Myoviridae		Felixounalikevirus	Erwinia phage phiEa21-4	Bacteria	Erwinia phage phiEa21-4 (EU710883)	dsDNA
JQ086375	383395063	60	54.4844	43741	Escherichia phage HK578	Escherichia phage HK578	Escherichia coli	Escherichia coli	Escherichia	Enterobacteriaceae	Caudovirales	Siphoviridae		Hk578likevirus	Escherichia phage HK578	Bacteria	Escherichia phage HK578 (JQ086375)	dsDNA
JN593240	344055539	204	44.4986	157304	Escherichia phage Cba120	Escherichia phage Cba120	Escherichia coli; O157:H7; NCTC 12900	NA	Escherichia	Enterobacteriaceae	Caudovirales	Myoviridae		Viunalikevirus	Escherichia phage Cba120	Bacteria	Escherichia phage Cba120 (JN593240)	dsDNA
DQ121662	71149512	82	44.0007	46072	Escherichia phage Jk06	Escherichia phage Jk06	NA	NA	NA	NA	Caudovirales	Siphoviridae		Tunalikevirus	Escherichia phage Jk06	Bacteria	Escherichia phage Jk06 (DQ121662)	dsDNA
NC001604	9627425	60	48.3987	39937	Enterobacteria phage T7	Enterobacteria phage T7	Escherichia coli	Escherichia coli	Escherichia	Enterobacteriaceae	Caudovirales	Podoviridae	Autographivirinae	T7likevirus	Enterobacteria phage T7	Bacteria	Enterobacteria phage T7 (NC001604)	dsDNA
EU340421	344196584	50	42.0182	31841	Lactobacillus phage c5	Lactobacillus phage c5	Lactobacillus delbrueckii subsp. bulgaricus	Lactobacillus delbrueckii	Lactobacillus	Lactobacillaceae	Caudovirales	Siphoviridae		C5likevirus	Lactobacillus phage c5	Bacteria	Lactobacillus phage c5 (EU340421)	dsDNA
KC139514	451937615	71	56.5527	59815	Salmonella phage FSL SP-039	Salmonella phage FSLSP030	Salmonella enterica	Salmonella enterica	Salmonella	Enterobacteriaceae	Caudovirales	Siphoviridae		Chilikevirus	Salmonella phage FSLSP030	Bacteria	Salmonella phage FSLSP030 (KC139514)	dsDNA
DQ126339	155030137	55	48.972	39104	Escherichia phage phiV10	Escherichia phage phiV10	Escherichia coli O157:H7	Escherichia coli	Escherichia	Enterobacteriaceae	Caudovirales	Podoviridae		Epsilon15likevirus	Escherichia phage PhiV10	Bacteria	Escherichia phage PhiV10 (DQ126339)	dsDNA
CP000917	182630511	170	39.9005	111382	Escherichia phage Eps7	Escherichia phage Eps7	Escherichia coli, Salmonella typhimurium, Salmonella enteritidis	NA	Escherichia	Enterobacteriaceae	Caudovirales	Siphoviridae		T5likevirus	Escherichia phage Eps7	Bacteria	Escherichia phage Eps7 (CP000917)	dsDNA
EF056009	117650898	72	41.304	70153	Escherichia phage N4	Escherichia phage N4	Escherichia coli K-12	Escherichia coli	Escherichia	Enterobacteriaceae	Caudovirales	Podoviridae		N4likevirus	Escherichia phage N4	Bacteria	Escherichia phage N4 (EF056009)	dsDNA
KC677662	513076257	73	56.3084	59254	Salmonella phage iEPS5	Salmonella phage iEPS5	Salmonella enterica serovar Typhimurium SL1344	Salmonella enterica	Salmonella	Enterobacteriaceae	Caudovirales	Siphoviridae		Chilikevirus	Salmonella phage iEPS5	Bacteria	Salmonella phage iEPS5 (KC677662)	dsDNA
FJ373894	226973481	216	50.3981	158006	Shigella phage Ag3	Shigella phage Ag3	Shigella boydii	Shigella boydii	Shigella	Enterobacteriaceae	Caudovirales	Myoviridae		Viunalikevirus	Shigella phage Ag3	Bacteria	Shigella phage Ag3 (FJ373894)	dsDNA
JN984867	359840885	57	54.4207	44077	Shigella phage EP23	Shigella phage EP23	Shigella sonnei	Shigella sonnei	Shigella	Enterobacteriaceae	Caudovirales	Siphoviridae		Hk578likevirus	Shigella phage EP23	Bacteria	Shigella phage EP23 (JN984867)	dsDNA
AY150271	30266034	51	50.8482	39671	Salmonella phage epsilon15	Salmonella phage epsilon15	Salmonella enterica	Salmonella enterica	Salmonella	Enterobacteriaceae	Caudovirales	Podoviridae		Epsilon15likevirus	Salmonella phage epsilon15	Bacteria	Salmonella phage epsilon15 (AY150271)	dsDNA
U32222	3337249	46	53.0858	30624	Enterobacteria phage 186	Enterobacteria phage 186	NA	NA	NA	NA	Caudovirales	Myoviridae	Peduovirinae	P2likevirus	Enterobacteria phage 186	Bacteria	Enterobacteria phage 186 (U32222)	dsDNA
AF527608	21914413	72	47.0904	41724	Salmonella phage P22-pbi	Enterobacteria phage P22	Salmonella enteria serovar typhimurium	NA	Salmonella	Enterobacteriaceae	Caudovirales	Podoviridae		P22likevirus	Enterobacteria phage P22	Bacteria	Enterobacteria phage P22 (AF527608)	dsDNA
DQ426904	90110542	49	41.567	34525	Mannheimia phage phiMhaA1-PHL101	Mannheimia phage phiMhaA1-PHL101	Mannheimia haemolytica biovar 1 serotype A1; ST1	Mannheimia haemolytica	Mannheimia	Pasteurellaceae	Caudovirales	Myoviridae	Peduovirinae	P2likevirus	Mannheimia phage phiMhaA1-PHL101	Bacteria	Mannheimia phage phiMhaA1-PHL101 (DQ426904)	dsDNA
DQ873690	111433558	51	64.1902	36409	Pseudomonas phage MP22	Pseudomonas phage MP22	Pseudomonas aeruignosa PA14	NA	Pseudomonas	Pseudomonadaceae	Caudovirales	Siphoviridae		D3112likevirus	Pseudomonas phage MP22	Bacteria	Pseudomonas phage MP22 (DQ873690)	dsDNA
AY095314	26051202	67	49.5197	46012	Vibrio phage VpV262	Vibrio phage VpV262	Vibrio parahaemolyticus	Vibrio parahaemolyticus	Vibrio	Vibrionaceae	Caudovirales	Podoviridae		Unassigned	Vibrio phage VpV262	Bacteria	Vibrio phage VpV262 (AY095314)	dsDNA
AF335538	13517559	58	46.6877	38297	Salmonella phage HK620	Salmonella phage HK620	Escherichia coli H, strain 2158	Escherichia coli	Escherichia	Enterobacteriaceae	Caudovirales	Podoviridae		P22likevirus	Salmonella phage HK620	Bacteria	Salmonella phage HK620 (AF335538)	dsDNA
JX486087	408385589	60	47.5975	38002	Lactobacillus phage ATCC8014	Lactobacillus phage ATCC8014	Lactobacillus plantarum ATCC 8014	Lactobacillus plantarum	Lactobacillus	Lactobacillaceae	Caudovirales	Siphoviridae		Phijlunalikevirus	Lactobacillus phage ATCC8014	Bacteria	Lactobacillus phage ATCC8014 (JX486087)	dsDNA
AM156909	80750651	75	44.2827	46219	Escherichia phage Rtp	Escherichia phage Rtp	Escherichia Coli	NA	Escherichia	Enterobacteriaceae	Caudovirales	Siphoviridae		Tunalikevirus	Escherichia phage Rtp	Bacteria	Escherichia phage Rtp (AM156909)	dsDNA
HE775250	387155563	58	49.7889	42391	Salmonella phage Ent1	Salmonella phage Ent1	Salmonella enterica subsp. enterica serovar Enteritidis	Salmonella enterica	Salmonella	Enterobacteriaceae	Caudovirales	Siphoviridae		Jerseylikevirus	Salmonella phage Ent1	Bacteria	Salmonella phage Ent1 (HE775250)	dsDNA
JF461087	347466883	128	38.9327	83331	Salmonella phage FO1a	Salmonella phage FelixO1	Salmonella enterica	Salmonella enterica	Salmonella	Enterobacteriaceae	Caudovirales	Myoviridae		Felixounalikevirus	Salmonella phage FelixO1	Bacteria	Salmonella phage FelixO1 (JF461087)	dsDNA
JF770475	338235630	74	44.0187	47180	Escherichia phage EB49	Escherichia phage EB49	Escherichia coli CFT073	Escherichia coli	Escherichia	Enterobacteriaceae	Caudovirales	Siphoviridae		Tunalikevirus	Escherichia phage Eb49	Bacteria	Escherichia phage Eb49 (JF770475)	dsDNA
FJ750948	543383050	66	54.6671	44899	Enterobacteria phage SSL2009a	Enterobacteria phage SSL2009a	Escherichia coli	Escherichia coli	Escherichia	Enterobacteriaceae	Caudovirales	Siphoviridae		Hk578likevirus	Enterobacteria phage SSL2009a	Bacteria	Enterobacteria phage SSL2009a (FJ750948)	dsDNA
NC007807	89152532	53	44.8933	43365	Pseudomonas phage 119X	Pseudomonas phage 119X	Pseudomonas aeruginosa	Pseudomonas aeruginosa	Pseudomonas	Pseudomonadaceae	Caudovirales	Podoviridae		Unassigned	Pseudomonas phage 119X	Bacteria	Pseudomonas phage 119X (NC007807)	dsDNA
AY308796	38046731	87	42.6797	49902	Escherichia phage Tls	Escherichia phage Tls	NA	NA	NA	NA	Caudovirales	Siphoviridae		Tunalikevirus	Escherichia phage Tls	Bacteria	Escherichia phage Tls (AY308796)	dsDNA
AF320576	33340243	247	39.0064	86155	Salmonella phage FelixO1	Salmonella phage FelixO1	NA	NA	NA	NA	Caudovirales	Myoviridae		Felixounalikevirus	Salmonella phage FelixO1	Bacteria	Salmonella phage FelixO1 (AF320576)	dsDNA
AF125163	17865393	44	48.8975	33106	Vibrio phage K139	Vibrio phage K139	Vibrio cholerae O139	Vibrio cholerae	Vibrio	Vibrionaceae	Caudovirales	Myoviridae	Peduovirinae	Hpunalikevirus	Vibrio phage K139	Bacteria	Vibrio phage K139 (AF125163)	dsDNA
KF148055	520728201	69	49.9712	43447	Salmonella phage Jersey	Salmonella phage Jersey	NA	NA	NA	NA	Caudovirales	Siphoviridae		Jerseylikevirus	Salmonella phage jersey	Bacteria	Salmonella phage jersey (KF148055)	dsDNA
JN672684	351162320	83	47.9018	51543	Enterobacter phage F20	Enterobacter phage F20	Enterobacter aerogenes	Enterobacter aerogenes	Enterobacter	Enterobacteriaceae	Caudovirales	Siphoviridae		Tunalikevirus	Enterobacter phage F20	Bacteria	Enterobacter phage F20 (JN672684)	dsDNA
