# Supplementary material for: Diverse lytic bacteriophages from India reveal genomic signatures and therapeutic potential against MDR Escherichia coli
Source: Research Square preprint supplement (doi:10.21203/rs.3.rs-6564877/v1), 2025-05-14
Supplement: Supplementary file 2 [file aa1c8fb845a11437c884d96b.xlsx]

## Sheet: BASU2_PhageClaud
			Phage	organism	distance
		0	LC516895	Escherichia_phage_vB_EcoS-DELF2	0.0512805
		1	MF093736	Shigella_phage_vB_SsoS-ISF002	0.055465
		2	MN296515	Shigella_virus_Sfin-3	0.0578986
		3	MH917278	Shigella_phage_phi2457T	0.0595515
		4	MN342247	Shigella_phage_Sfin-5	0.0597715
		5	MF468274	Shigella_phage_Sfin-1	0.0597874
		6	MN337573	Shigella_phage_Sfin-4	0.059791
		7	MN393473	Shigella_phage_Sfin-6	0.0598825
		8	MT427400	Escherichia_phage_phi2013	0.0610412
		9	KU194206	Escherichia_phage_JMPW1	0.0612102
		10	MH051912	Enterobacteria_phage_vB_EcoS_IME167	0.0612118
		11	MT682715	Escherichia_phage_vB_EcoS_Chapo	0.0661883
		12	JX912252	Escherichia_phage_ADB-2	0.0663052
		13	KP085586	Shigella_phage_pSf-2	0.0667675
		14	KX828710	Shigella_phage_SH6	0.0717079
		15	KY985004	Escherichia_phage_vB_EcoS_SH2	0.0719526
		16	MH051911	Enterobacteria_phage_vB_EcoS_IME18	0.075992
		17	KU194205	Escherichia_phage_JMPW2	0.0786755
		18	MG049919	Shigella_phage_vB_SflS-ISF001	0.0791072
		19	MH285980	Escherichia_phage_Eco_BIFF	0.082459
		20	AY216660	Escherichia_virus_T1	0.0840982
		21	MK213796	Escherichia_phage_T1	0.0840982
		22	NC_005833	Escherichia_virus_T1	0.0840982
		23	MN153797	Escherichia_virus_T1	0.0849648
		24	HM035024	Shigella_virus_Shfl1	0.0873058
		25	MK335533	Shigella_phage_vB_SsoS_008	0.0924469

## Sheet: BASU7_PhageClaud
	Phage	organism	distance
0	MT427400	Escherichia_phage_phi2013	0.0505563
1	KU194206	Escherichia_phage_JMPW1	0.0506439
2	MH051912	Enterobacteria_phage_vB_EcoS_IME167	0.0506736
3	MN296515	Shigella_virus_Sfin-3	0.0533601
4	JX912252	Escherichia_phage_ADB-2	0.0548362
5	LC516895	Escherichia_phage_vB_EcoS-DELF2	0.0570567
6	MH917278	Shigella_phage_phi2457T	0.0579474
7	MN337573	Shigella_phage_Sfin-4	0.0591796
8	MN342247	Shigella_phage_Sfin-5	0.0592033
9	MF468274	Shigella_phage_Sfin-1	0.0592103
10	MN393473	Shigella_phage_Sfin-6	0.0592938
11	KY985004	Escherichia_phage_vB_EcoS_SH2	0.0617439
12	MF093736	Shigella_phage_vB_SsoS-ISF002	0.0636045
13	KP085586	Shigella_phage_pSf-2	0.064924
14	KX828710	Shigella_phage_SH6	0.0662987
15	MH051911	Enterobacteria_phage_vB_EcoS_IME18	0.0708726
16	KU194205	Escherichia_phage_JMPW2	0.0715094
17	MH285980	Escherichia_phage_Eco_BIFF	0.0719452
18	AY216660	Escherichia_virus_T1	0.0734448
19	MK213796	Escherichia_phage_T1	0.0734448
20	NC_005833	Escherichia_virus_T1	0.0734448
21	MN153797	Escherichia_virus_T1	0.0742201
22	HM035024	Shigella_virus_Shfl1	0.0836142
23	MT682715	Escherichia_phage_vB_EcoS_Chapo	0.0844828
24	MG049919	Shigella_phage_vB_SflS-ISF001	0.0856426
25	MK335533	Shigella_phage_vB_SsoS_008	0.0891115

## Sheet: BASU10_PhageClaud
	Phage	organism	distance
0	LC516895	Escherichia_phage_vB_EcoS-DELF2	0.0513023
1	MF093736	Shigella_phage_vB_SsoS-ISF002	0.0555165
2	MN296515	Shigella_virus_Sfin-3	0.0579578
3	MH917278	Shigella_phage_phi2457T	0.0595645
4	MN342247	Shigella_phage_Sfin-5	0.0597845
5	MF468274	Shigella_phage_Sfin-1	0.0598005
6	MN337573	Shigella_phage_Sfin-4	0.059804
7	MN393473	Shigella_phage_Sfin-6	0.0598955
8	MT427400	Escherichia_phage_phi2013	0.0610521
9	KU194206	Escherichia_phage_JMPW1	0.0612212
10	MH051912	Enterobacteria_phage_vB_EcoS_IME167	0.0612227
11	MT682715	Escherichia_phage_vB_EcoS_Chapo	0.0661772
12	JX912252	Escherichia_phage_ADB-2	0.0663792
13	KP085586	Shigella_phage_pSf-2	0.0666997
14	KX828710	Shigella_phage_SH6	0.0716424
15	KY985004	Escherichia_phage_vB_EcoS_SH2	0.0719042
16	MH051911	Enterobacteria_phage_vB_EcoS_IME18	0.0759842
17	KU194205	Escherichia_phage_JMPW2	0.0786587
18	MG049919	Shigella_phage_vB_SflS-ISF001	0.0792175
19	MH285980	Escherichia_phage_Eco_BIFF	0.0824769
20	AY216660	Escherichia_virus_T1	0.0840271
21	MK213796	Escherichia_phage_T1	0.0840271
22	NC_005833	Escherichia_virus_T1	0.0840271
23	MN153797	Escherichia_virus_T1	0.0848968
24	HM035024	Shigella_virus_Shfl1	0.0872511
25	MK335533	Shigella_phage_vB_SsoS_008	0.0924062

## Sheet: BASUE2
BASUE2_2	PHANOTATE	CDS	2	622	-430.449	-	0	ID=RBOZZYSD_CDS_0001;phrog=735;top_hit=MF327009_p19;locus_tag=RBOZZYSD_CDS_0001;function=head and packaging;product=terminase small subunit
BASUE2_2	PHANOTATE	CDS	625	1323	-551834	-	0	ID=RBOZZYSD_CDS_0002;phrog=227;top_hit=NC_020845_p15;locus_tag=RBOZZYSD_CDS_0002;function=tail;product=tail sheath stabilizer
BASUE2_2	PHANOTATE	CDS	1326	1967	-748664	-	0	ID=RBOZZYSD_CDS_0003;phrog=679;top_hit=FR823450_p102;locus_tag=RBOZZYSD_CDS_0003;function=connector;product=head closure Hc2
BASUE2_2	PHANOTATE	CDS	2029	2241	-99.4709	+	0	ID=RBOZZYSD_CDS_0004;phrog=4466;top_hit=MG428991_p45;locus_tag=RBOZZYSD_CDS_0004;function=unknown function;product=hypothetical protein
BASUE2_2	PHANOTATE	CDS	2270	3076	-1.98697e+06	-	0	ID=RBOZZYSD_CDS_0005;phrog=211;top_hit=FR823450_p149;locus_tag=RBOZZYSD_CDS_0005;function=connector;product=head-tail adaptor Ad2
BASUE2_2	PHANOTATE	CDS	3009	3350	-313.487	-	0	ID=RBOZZYSD_CDS_0006;phrog=3961;top_hit=NC_025446_p122;locus_tag=RBOZZYSD_CDS_0006;function=unknown function;product=hypothetical protein
BASUE2_2	PHANOTATE	CDS	3334	3582	-16.8729	-	0	ID=RBOZZYSD_CDS_0007;phrog=4322;top_hit=KY630163_p158;locus_tag=RBOZZYSD_CDS_0007;function=head and packaging;product=virion structural protein
BASUE2_2	PHANOTATE	CDS	3635	8473	-1.32189e+24	-	0	ID=RBOZZYSD_CDS_0008;phrog=358;top_hit=p52191 VI_08944;locus_tag=RBOZZYSD_CDS_0008;function=unknown function;product=hypothetical protein
BASUE2_2	PHANOTATE	CDS	8580	10511	-8.2977e+08	-	0	ID=RBOZZYSD_CDS_0009;phrog=38183;top_hit=NC_019530_p136;locus_tag=RBOZZYSD_CDS_0009;function=tail;product=tail protein
BASUE2_2	PHANOTATE	CDS	10572	12761	-1.2477e+08	-	0	ID=RBOZZYSD_CDS_0010;phrog=18522;top_hit=p156043 VI_07575;locus_tag=RBOZZYSD_CDS_0010;function=tail;product=tail protein
BASUE2_2	PHANOTATE	CDS	12859	14985	-6.7191e+06	-	0	ID=RBOZZYSD_CDS_0011;phrog=1819;top_hit=JX202565_p38;locus_tag=RBOZZYSD_CDS_0011;function=tail;product=tail spike protein
BASUE2_2	PHANOTATE	CDS	14982	15116	-7.56588	-	0	ID=RBOZZYSD_CDS_0012;phrog=No_PHROG;top_hit=No_PHROG;locus_tag=RBOZZYSD_CDS_0012;function=unknown function;product=hypothetical protein
BASUE2_2	PHANOTATE	CDS	15089	18592	-7.92522e+13	-	0	ID=RBOZZYSD_CDS_0013;phrog=36390;top_hit=NC_027119_p201;locus_tag=RBOZZYSD_CDS_0013;function=tail;product=tail spike protein
BASUE2_2	PHANOTATE	CDS	18639	19829	-17453.4	-	0	ID=RBOZZYSD_CDS_0014;phrog=3838;top_hit=NC_022343_p94;locus_tag=RBOZZYSD_CDS_0014;function=unknown function;product=hypothetical protein
BASUE2_2	PHANOTATE	CDS	19832	20686	-3.97529e+06	-	0	ID=RBOZZYSD_CDS_0015;phrog=3465;top_hit=NC_022343_p93;locus_tag=RBOZZYSD_CDS_0015;function=connector;product=head closure Hc2
BASUE2_2	PHANOTATE	CDS	20670	22463	-1.13817e+12	-	0	ID=RBOZZYSD_CDS_0016;phrog=219;top_hit=KU686208_p78;locus_tag=RBOZZYSD_CDS_0016;function=tail;product=baseplate wedge subunit
BASUE2_2	PHANOTATE	CDS	22479	22637	-7.55764	+	0	ID=RBOZZYSD_CDS_0017;phrog=No_PHROG;top_hit=No_PHROG;locus_tag=RBOZZYSD_CDS_0017;function=unknown function;product=hypothetical protein
BASUE2_2	PHANOTATE	CDS	22732	22839	-0.078645	+	0	ID=RBOZZYSD_CDS_0018;phrog=No_PHROG;top_hit=No_PHROG;locus_tag=RBOZZYSD_CDS_0018;function=unknown function;product=hypothetical protein
BASUE2_2	PHANOTATE	CDS	22815	23384	-1388.77	+	0	ID=RBOZZYSD_CDS_0019;phrog=3788;top_hit=MG770379_p108;locus_tag=RBOZZYSD_CDS_0019;function=unknown function;product=hypothetical protein
BASUE2_2	PHANOTATE	CDS	23442	23588	-4.94683	+	0	ID=RBOZZYSD_CDS_0020;phrog=8415;top_hit=MG428992_p39;locus_tag=RBOZZYSD_CDS_0020;function=unknown function;product=hypothetical protein
BASUE2_2	PHANOTATE	CDS	23640	23756	-0.330354	-	0	ID=RBOZZYSD_CDS_0021;phrog=No_PHROG;top_hit=No_PHROG;locus_tag=RBOZZYSD_CDS_0021;function=unknown function;product=hypothetical protein
BASUE2_2	PHANOTATE	CDS	23795	23899	-2.98409	-	0	ID=RBOZZYSD_CDS_0022;phrog=No_PHROG;top_hit=No_PHROG;locus_tag=RBOZZYSD_CDS_0022;function=unknown function;product=hypothetical protein
BASUE2_2	PHANOTATE	CDS	23907	24179	-3.10094	-	0	ID=RBOZZYSD_CDS_0023;phrog=No_PHROG;top_hit=No_PHROG;locus_tag=RBOZZYSD_CDS_0023;function=unknown function;product=hypothetical protein
BASUE2_2	PHANOTATE	CDS	24214	24321	-1.71251	-	0	ID=RBOZZYSD_CDS_0024;phrog=No_PHROG;top_hit=No_PHROG;locus_tag=RBOZZYSD_CDS_0024;function=unknown function;product=hypothetical protein
BASUE2_2	PHANOTATE	CDS	24460	24624	-0.785894	+	0	ID=RBOZZYSD_CDS_0025;phrog=No_PHROG;top_hit=No_PHROG;locus_tag=RBOZZYSD_CDS_0025;function=unknown function;product=hypothetical protein
BASUE2_2	PHANOTATE	CDS	24614	24709	-0.0860309	-	0	ID=RBOZZYSD_CDS_0026;phrog=No_PHROG;top_hit=No_PHROG;locus_tag=RBOZZYSD_CDS_0026;function=unknown function;product=hypothetical protein
BASUE2_2	PHANOTATE	CDS	24699	24863	-2.29882	-	0	ID=RBOZZYSD_CDS_0027;phrog=No_PHROG;top_hit=No_PHROG;locus_tag=RBOZZYSD_CDS_0027;function=unknown function;product=hypothetical protein
BASUE2_2	PHANOTATE	CDS	24865	25041	-2.02769	-	0	ID=RBOZZYSD_CDS_0028;phrog=No_PHROG;top_hit=No_PHROG;locus_tag=RBOZZYSD_CDS_0028;function=unknown function;product=hypothetical protein
BASUE2_2	PHANOTATE	CDS	25072	25215	-9.88503	-	0	ID=RBOZZYSD_CDS_0029;phrog=No_PHROG;top_hit=No_PHROG;locus_tag=RBOZZYSD_CDS_0029;function=unknown function;product=hypothetical protein
BASUE2_2	PHANOTATE	CDS	25253	25423	-2.46947	-	0	ID=RBOZZYSD_CDS_0030;phrog=No_PHROG;top_hit=No_PHROG;locus_tag=RBOZZYSD_CDS_0030;function=unknown function;product=hypothetical protein
BASUE2_2	PHANOTATE	CDS	25461	25574	-0.196189	-	0	ID=RBOZZYSD_CDS_0031;phrog=No_PHROG;top_hit=No_PHROG;locus_tag=RBOZZYSD_CDS_0031;function=unknown function;product=hypothetical protein
BASUE2_2	PHANOTATE	CDS	25571	25660	-1.28489	-	0	ID=RBOZZYSD_CDS_0032;phrog=No_PHROG;top_hit=No_PHROG;locus_tag=RBOZZYSD_CDS_0032;function=unknown function;product=hypothetical protein
BASUE2_2	tRNAscan-SE	tRNA	25665	25741	64.7	+	.	ID=RBOZZYSD_tRNA_0001;trna=tRNA-Met(CAT);isotype=Met;anticodon=CAT;locus_tag=RBOZZYSD_tRNA_0001
BASUE2_2	PHANOTATE	CDS	25779	25979	-27.1886	+	0	ID=RBOZZYSD_CDS_0033;phrog=3684;top_hit=NC_005260_p176;locus_tag=RBOZZYSD_CDS_0033;function=unknown function;product=hypothetical protein
BASUE2_2	tRNAscan-SE	tRNA	25981	26056	76.7	+	.	ID=RBOZZYSD_tRNA_0002;trna=tRNA-Asn(GTT);isotype=Asn;anticodon=GTT;locus_tag=RBOZZYSD_tRNA_0002
BASUE2_2	PHANOTATE	CDS	26077	26568	-35684.7	+	0	ID=RBOZZYSD_CDS_0034;phrog=5018;top_hit=NC_011534_p21;locus_tag=RBOZZYSD_CDS_0034;function=unknown function;product=hypothetical protein
BASUE2_2	PHANOTATE	CDS	26633	26761	-0.514928	+	0	ID=RBOZZYSD_CDS_0035;phrog=No_PHROG;top_hit=No_PHROG;locus_tag=RBOZZYSD_CDS_0035;function=unknown function;product=hypothetical protein
BASUE2_2	PHANOTATE	CDS	26791	27033	-0.872411	+	0	ID=RBOZZYSD_CDS_0036;phrog=No_PHROG;top_hit=No_PHROG;locus_tag=RBOZZYSD_CDS_0036;function=unknown function;product=hypothetical protein
BASUE2_2	tRNAscan-SE	tRNA	27111	27194	58.3	+	.	ID=RBOZZYSD_tRNA_0003;trna=tRNA-Tyr(GTA);isotype=Tyr;anticodon=GTA;locus_tag=RBOZZYSD_tRNA_0003
BASUE2_2	tRNAscan-SE	tRNA	27271	27359	69.6	+	.	ID=RBOZZYSD_tRNA_0004;trna=tRNA-Ser(GCT);isotype=Ser;anticodon=GCT;locus_tag=RBOZZYSD_tRNA_0004
BASUE2_2	tRNAscan-SE	tRNA	27363	27448	46.9	+	.	ID=RBOZZYSD_tRNA_0005;trna=tRNA-Undet(NNN);isotype=Undet;anticodon=NNN;locus_tag=RBOZZYSD_tRNA_0005
BASUE2_2	PHANOTATE	CDS	27449	27763	-45.7845	-	0	ID=RBOZZYSD_CDS_0037;phrog=No_PHROG;top_hit=No_PHROG;locus_tag=RBOZZYSD_CDS_0037;function=unknown function;product=hypothetical protein
BASUE2_2	PHANOTATE	CDS	27744	27980	-4.35135	+	0	ID=RBOZZYSD_CDS_0038;phrog=4772;top_hit=p378326 VI_09986;locus_tag=RBOZZYSD_CDS_0038;function=unknown function;product=hypothetical protein
BASUE2_2	PHANOTATE	CDS	27991	28506	-45.7405	+	0	ID=RBOZZYSD_CDS_0039;phrog=1030;top_hit=p229367 VI_02514;locus_tag=RBOZZYSD_CDS_0039;function=tail;product=tail needle knob
BASUE2_2	PHANOTATE	CDS	28578	29279	-70078.9	+	0	ID=RBOZZYSD_CDS_0040;phrog=4050;top_hit=NC_022768_p29;locus_tag=RBOZZYSD_CDS_0040;function=unknown function;product=hypothetical protein
BASUE2_2	PHANOTATE	CDS	29349	30551	-2.03776e+06	+	0	ID=RBOZZYSD_CDS_0041;phrog=3650;top_hit=KR080200_p2;locus_tag=RBOZZYSD_CDS_0041;function=unknown function;product=hypothetical protein
BASUE2_2	PHANOTATE	CDS	30591	31040	-5465.1	+	0	ID=RBOZZYSD_CDS_0042;phrog=4700;top_hit=NC_022768_p27;locus_tag=RBOZZYSD_CDS_0042;function=unknown function;product=hypothetical protein
BASUE2_2	PHANOTATE	CDS	31076	31534	-6491.89	+	0	ID=RBOZZYSD_CDS_0043;phrog=3852;top_hit=NC_022768_p26;locus_tag=RBOZZYSD_CDS_0043;function=unknown function;product=hypothetical protein
BASUE2_2	PHANOTATE	CDS	31561	31935	-5356.01	-	0	ID=RBOZZYSD_CDS_0044;phrog=6044;top_hit=NC_019530_p149;locus_tag=RBOZZYSD_CDS_0044;function=unknown function;product=hypothetical protein
BASUE2_2	PHANOTATE	CDS	31932	32489	-1079.18	-	0	ID=RBOZZYSD_CDS_0045;phrog=4687;top_hit=NC_027119_p187;locus_tag=RBOZZYSD_CDS_0045;function=unknown function;product=hypothetical protein
BASUE2_2	PHANOTATE	CDS	32486	32635	-4.35992	-	0	ID=RBOZZYSD_CDS_0046;phrog=12990;top_hit=NC_022768_p24;locus_tag=RBOZZYSD_CDS_0046;function=unknown function;product=hypothetical protein
BASUE2_2	PHANOTATE	CDS	32684	33421	-64829.6	-	0	ID=RBOZZYSD_CDS_0047;phrog=4823;top_hit=NC_029042_p32;locus_tag=RBOZZYSD_CDS_0047;function=unknown function;product=hypothetical protein
BASUE2_2	PHANOTATE	CDS	33591	34181	-1457.11	-	0	ID=RBOZZYSD_CDS_0048;phrog=2524;top_hit=NC_020863_p154;locus_tag=RBOZZYSD_CDS_0048;function=unknown function;product=hypothetical protein
BASUE2_2	PHANOTATE	CDS	34243	37239	-6.23428e+22	+	0	ID=RBOZZYSD_CDS_0049;phrog=262;top_hit=KX349252_p160;locus_tag=RBOZZYSD_CDS_0049;function=DNA, RNA and nucleotide metabolism;product=DNA polymerase
BASUE2_2	PHANOTATE	CDS	37300	37644	-90.9721	+	0	ID=RBOZZYSD_CDS_0050;phrog=3748;top_hit=MG266157_p180;locus_tag=RBOZZYSD_CDS_0050;function=unknown function;product=hypothetical protein
BASUE2_2	PHANOTATE	CDS	37577	38419	-946117	+	0	ID=RBOZZYSD_CDS_0051;phrog=420;top_hit=AP018399_p172;locus_tag=RBOZZYSD_CDS_0051;function=unknown function;product=unknown function
BASUE2_2	PHANOTATE	CDS	38487	38735	-85.3098	+	0	ID=RBOZZYSD_CDS_0052;phrog=3911;top_hit=MG266157_p182;locus_tag=RBOZZYSD_CDS_0052;function=unknown function;product=hypothetical protein
BASUE2_2	PHANOTATE	CDS	38735	39640	-82189	+	0	ID=RBOZZYSD_CDS_0053;phrog=4409;top_hit=NC_024122_p107;locus_tag=RBOZZYSD_CDS_0053;function=other;product=guanylate kinase
BASUE2_2	PHANOTATE	CDS	39643	39846	-37.0139	+	0	ID=RBOZZYSD_CDS_0054;phrog=4514;top_hit=NC_013693_p201;locus_tag=RBOZZYSD_CDS_0054;function=unknown function;product=hypothetical protein
BASUE2_2	PHANOTATE	CDS	39848	40198	-192.087	+	0	ID=RBOZZYSD_CDS_0055;phrog=4163;top_hit=NC_019452_p195;locus_tag=RBOZZYSD_CDS_0055;function=unknown function;product=hypothetical protein
BASUE2_2	PHANOTATE	CDS	40182	41423	-3.10687e+06	+	0	ID=RBOZZYSD_CDS_0056;phrog=3271;top_hit=NC_022331_p3;locus_tag=RBOZZYSD_CDS_0056;function=unknown function;product=hypothetical protein
BASUE2_2	PHANOTATE	CDS	41459	41626	-33.6516	+	0	ID=RBOZZYSD_CDS_0057;phrog=3879;top_hit=KX229736_p103;locus_tag=RBOZZYSD_CDS_0057;function=unknown function;product=hypothetical protein
BASUE2_2	PHANOTATE	CDS	41708	41899	-5.36228	+	0	ID=RBOZZYSD_CDS_0058;phrog=7747;top_hit=NC_022768_p11;locus_tag=RBOZZYSD_CDS_0058;function=unknown function;product=hypothetical protein
BASUE2_2	PHANOTATE	CDS	41911	42123	-12.7534	+	0	ID=RBOZZYSD_CDS_0059;phrog=5099;top_hit=MG266157_p189;locus_tag=RBOZZYSD_CDS_0059;function=unknown function;product=hypothetical protein
BASUE2_2	PHANOTATE	CDS	42120	42506	-525.649	+	0	ID=RBOZZYSD_CDS_0060;phrog=5047;top_hit=NC_023856_p123;locus_tag=RBOZZYSD_CDS_0060;function=unknown function;product=hypothetical protein
BASUE2_2	PHANOTATE	CDS	42503	43612	-6.79017e+06	+	0	ID=RBOZZYSD_CDS_0061;phrog=23737;top_hit=NC_023856_p121;locus_tag=RBOZZYSD_CDS_0061;function=unknown function;product=hypothetical protein
BASUE2_2	PHANOTATE	CDS	43628	44197	-16140.8	+	0	ID=RBOZZYSD_CDS_0062;phrog=1383;top_hit=KU886225_p47;locus_tag=RBOZZYSD_CDS_0062;function=head and packaging;product=virion structural protein
BASUE2_2	PHANOTATE	CDS	44202	44624	-750.546	+	0	ID=RBOZZYSD_CDS_0063;phrog=4236;top_hit=NC_016570_p200;locus_tag=RBOZZYSD_CDS_0063;function=unknown function;product=hypothetical protein
BASUE2_2	PHANOTATE	CDS	44639	45058	-37.5796	+	0	ID=RBOZZYSD_CDS_0064;phrog=4130;top_hit=KX147096_p72;locus_tag=RBOZZYSD_CDS_0064;function=unknown function;product=hypothetical protein
BASUE2_2	PHANOTATE	CDS	45055	45504	-431.834	+	0	ID=RBOZZYSD_CDS_0065;phrog=4168;top_hit=MG428990_p5;locus_tag=RBOZZYSD_CDS_0065;function=unknown function;product=hypothetical protein
BASUE2_2	PHANOTATE	CDS	45570	45863	-42.3572	+	0	ID=RBOZZYSD_CDS_0066;phrog=9000;top_hit=NC_013693_p215;locus_tag=RBOZZYSD_CDS_0066;function=unknown function;product=hypothetical protein
BASUE2_2	PHANOTATE	CDS	45873	46226	-540.653	+	0	ID=RBOZZYSD_CDS_0067;phrog=3959;top_hit=NC_020083_p2;locus_tag=RBOZZYSD_CDS_0067;function=unknown function;product=hypothetical protein
BASUE2_2	PHANOTATE	CDS	46340	49075	-3.32725e+19	+	0	ID=RBOZZYSD_CDS_0068;phrog=3661;top_hit=NC_020083_p1;locus_tag=RBOZZYSD_CDS_0068;function=lysis;product=RIIA lysis inhibitor
BASUE2_2	PHANOTATE	CDS	49108	50691	-3.34166e+11	+	0	ID=RBOZZYSD_CDS_0069;phrog=3803;top_hit=KX171211_p155;locus_tag=RBOZZYSD_CDS_0069;function=lysis;product=RIIB lysis inhibitor
BASUE2_2	PHANOTATE	CDS	50757	50891	-2.78214	+	0	ID=RBOZZYSD_CDS_0070;phrog=No_PHROG;top_hit=No_PHROG;locus_tag=RBOZZYSD_CDS_0070;function=unknown function;product=hypothetical protein
BASUE2_2	PHANOTATE	CDS	50961	51431	-5847.04	+	0	ID=RBOZZYSD_CDS_0071;phrog=3795;top_hit=KX171211_p153;locus_tag=RBOZZYSD_CDS_0071;function=unknown function;product=hypothetical protein
BASUE2_2	PHANOTATE	CDS	51464	51856	-2054.32	+	0	ID=RBOZZYSD_CDS_0072;phrog=10139;top_hit=MG383452_p171;locus_tag=RBOZZYSD_CDS_0072;function=unknown function;product=hypothetical protein
BASUE2_2	PHANOTATE	CDS	51835	52644	-1100.64	+	0	ID=RBOZZYSD_CDS_0073;phrog=215;top_hit=p9433 VI_01414;locus_tag=RBOZZYSD_CDS_0073;function=head and packaging;product=structural protein with Ig domain
BASUE2_2	PHANOTATE	CDS	52648	52869	-46.9875	+	0	ID=RBOZZYSD_CDS_0074;phrog=4805;top_hit=KY630163_p107;locus_tag=RBOZZYSD_CDS_0074;function=unknown function;product=hypothetical protein
BASUE2_2	PHANOTATE	CDS	52836	52979	-12.5775	+	0	ID=RBOZZYSD_CDS_0075;phrog=No_PHROG;top_hit=No_PHROG;locus_tag=RBOZZYSD_CDS_0075;function=unknown function;product=hypothetical protein
BASUE2_2	PHANOTATE	CDS	52957	53466	-5333.43	+	0	ID=RBOZZYSD_CDS_0076;phrog=4164;top_hit=KY630163_p106;locus_tag=RBOZZYSD_CDS_0076;function=DNA, RNA and nucleotide metabolism;product=histone family DNA-binding
BASUE2_2	PHANOTATE	CDS	53514	53705	-14.4052	+	0	ID=RBOZZYSD_CDS_0077;phrog=4835;top_hit=MG383452_p167;locus_tag=RBOZZYSD_CDS_0077;function=unknown function;product=hypothetical protein
BASUE2_2	PHANOTATE	CDS	53747	54232	-3209.31	+	0	ID=RBOZZYSD_CDS_0078;phrog=652;top_hit=MF893340_p127;locus_tag=RBOZZYSD_CDS_0078;function=unknown function;product=hypothetical protein
BASUE2_2	PHANOTATE	CDS	54229	54807	-65781.9	+	0	ID=RBOZZYSD_CDS_0079;phrog=1247;top_hit=MG603697_p4;locus_tag=RBOZZYSD_CDS_0079;function=other;product=MazG-like pyrophosphatase
BASUE2_2	PHANOTATE	CDS	54857	56770	-1.20144e+11	+	0	ID=RBOZZYSD_CDS_0080;phrog=543;top_hit=p46685 VI_00032;locus_tag=RBOZZYSD_CDS_0080;function=DNA, RNA and nucleotide metabolism;product=DNA topoisomerase II large subunit
BASUE2_2	PHANOTATE	CDS	56691	58103	-3.33093e+09	+	0	ID=RBOZZYSD_CDS_0081;phrog=551;top_hit=KT895374_p106;locus_tag=RBOZZYSD_CDS_0081;function=DNA, RNA and nucleotide metabolism;product=DNA topoisomerase II
BASUE2_2	PHANOTATE	CDS	58147	58425	-41.0107	+	0	ID=RBOZZYSD_CDS_0082;phrog=2241;top_hit=NC_019540_p27;locus_tag=RBOZZYSD_CDS_0082;function=unknown function;product=hypothetical protein
BASUE2_2	PHANOTATE	CDS	58427	58738	-39.8397	+	0	ID=RBOZZYSD_CDS_0083;phrog=3362;top_hit=KY630163_p99;locus_tag=RBOZZYSD_CDS_0083;function=unknown function;product=hypothetical protein
BASUE2_2	PHANOTATE	CDS	58742	59155	-712.196	+	0	ID=RBOZZYSD_CDS_0084;phrog=839;top_hit=NC_020079_p128;locus_tag=RBOZZYSD_CDS_0084;function=unknown function;product=hypothetical protein
BASUE2_2	PHANOTATE	CDS	59205	59429	-140.549	+	0	ID=RBOZZYSD_CDS_0085;phrog=5924;top_hit=NC_031128_p172;locus_tag=RBOZZYSD_CDS_0085;function=unknown function;product=hypothetical protein
BASUE2_2	PHANOTATE	CDS	59426	59662	-34.0324	+	0	ID=RBOZZYSD_CDS_0086;phrog=5593;top_hit=MG428990_p201;locus_tag=RBOZZYSD_CDS_0086;function=unknown function;product=hypothetical protein
BASUE2_2	PHANOTATE	CDS	59659	60264	-33049.4	+	0	ID=RBOZZYSD_CDS_0087;phrog=335;top_hit=MF490236_p17;locus_tag=RBOZZYSD_CDS_0087;function=other;product=phosphatase
BASUE2_2	PHANOTATE	CDS	60261	60605	-159.484	+	0	ID=RBOZZYSD_CDS_0088;phrog=5613;top_hit=NC_027340_p12;locus_tag=RBOZZYSD_CDS_0088;function=unknown function;product=hypothetical protein
BASUE2_2	PHANOTATE	CDS	60598	61230	-23639	+	0	ID=RBOZZYSD_CDS_0089;phrog=255;top_hit=NC_023557_p65;locus_tag=RBOZZYSD_CDS_0089;function=DNA, RNA and nucleotide metabolism;product=exonuclease
BASUE2_2	PHANOTATE	CDS	61308	61598	-8.61362	+	0	ID=RBOZZYSD_CDS_0090;phrog=2531;top_hit=NC_024783_p55;locus_tag=RBOZZYSD_CDS_0090;function=unknown function;product=hypothetical protein
BASUE2_2	PHANOTATE	CDS	61671	61967	-89.3058	+	0	ID=RBOZZYSD_CDS_0091;phrog=9302;top_hit=NC_031128_p178;locus_tag=RBOZZYSD_CDS_0091;function=unknown function;product=hypothetical protein
BASUE2_2	PHANOTATE	CDS	61967	62629	-4336.27	+	0	ID=RBOZZYSD_CDS_0092;phrog=1550;top_hit=KT919973_p374;locus_tag=RBOZZYSD_CDS_0092;function=moron, auxiliary metabolic gene and host takeover;product=QueC-like queuosine biosynthesis
BASUE2_2	PHANOTATE	CDS	62632	62973	-919.636	+	0	ID=RBOZZYSD_CDS_0093;phrog=4814;top_hit=p273142 VI_09054;locus_tag=RBOZZYSD_CDS_0093;function=unknown function;product=hypothetical protein
BASUE2_2	PHANOTATE	CDS	62955	63533	-11421.4	+	0	ID=RBOZZYSD_CDS_0094;phrog=547;top_hit=NC_024792_p125;locus_tag=RBOZZYSD_CDS_0094;function=other;product=phosphoesterase
BASUE2_2	PHANOTATE	CDS	63530	63862	-43.2243	+	0	ID=RBOZZYSD_CDS_0095;phrog=6872;top_hit=MF001362_p24;locus_tag=RBOZZYSD_CDS_0095;function=unknown function;product=hypothetical protein
BASUE2_2	PHANOTATE	CDS	63859	64209	-72.5868	+	0	ID=RBOZZYSD_CDS_0096;phrog=4677;top_hit=NC_031045_p70;locus_tag=RBOZZYSD_CDS_0096;function=unknown function;product=hypothetical protein
BASUE2_2	PHANOTATE	CDS	64273	64590	-1321.72	+	0	ID=RBOZZYSD_CDS_0097;phrog=4059;top_hit=NC_031045_p71;locus_tag=RBOZZYSD_CDS_0097;function=unknown function;product=hypothetical protein
BASUE2_2	PHANOTATE	CDS	64590	65111	-2199.25	+	0	ID=RBOZZYSD_CDS_0098;phrog=20648;top_hit=NC_020083_p173;locus_tag=RBOZZYSD_CDS_0098;function=DNA, RNA and nucleotide metabolism;product=dCMP deaminase
BASUE2_2	PHANOTATE	CDS	65113	65520	-40.0315	+	0	ID=RBOZZYSD_CDS_0099;phrog=3707;top_hit=NC_019910_p143;locus_tag=RBOZZYSD_CDS_0099;function=moron, auxiliary metabolic gene and host takeover;product=membrane-flanked domain
BASUE2_2	PHANOTATE	CDS	65521	65739	-2.00251	+	0	ID=RBOZZYSD_CDS_0100;phrog=926;top_hit=AP004402_p92;locus_tag=RBOZZYSD_CDS_0100;function=unknown function;product=hypothetical protein
BASUE2_2	PHANOTATE	CDS	65731	66351	-40138.5	-	0	ID=RBOZZYSD_CDS_0101;phrog=218;top_hit=KU594607_p7;locus_tag=RBOZZYSD_CDS_0101;function=connector;product=head closure
BASUE2_2	PHANOTATE	CDS	66405	67373	-54077.9	+	0	ID=RBOZZYSD_CDS_0102;phrog=230;top_hit=NC_014636_p330;locus_tag=RBOZZYSD_CDS_0102;function=tail;product=baseplate tail tube cap
BASUE2_2	PHANOTATE	CDS	67387	67944	-27976.1	+	0	ID=RBOZZYSD_CDS_0103;phrog=232;top_hit=NC_027132_p2;locus_tag=RBOZZYSD_CDS_0103;function=tail;product=baseplate wedge subunit
BASUE2_2	PHANOTATE	CDS	67941	69329	-8.08733e+07	+	0	ID=RBOZZYSD_CDS_0104;phrog=350;top_hit=MF448340_p356;locus_tag=RBOZZYSD_CDS_0104;function=tail;product=tail protein
BASUE2_2	PHANOTATE	CDS	69340	71280	-1.46375e+12	+	0	ID=RBOZZYSD_CDS_0105;phrog=3799;top_hit=NC_027119_p126;locus_tag=RBOZZYSD_CDS_0105;function=unknown function;product=hypothetical protein
BASUE2_2	PHANOTATE	CDS	71281	71943	-759407	-	0	ID=RBOZZYSD_CDS_0106;phrog=269;top_hit=KX349247_p1;locus_tag=RBOZZYSD_CDS_0106;function=DNA, RNA and nucleotide metabolism;product=DNA helicase loader
BASUE2_2	PHANOTATE	CDS	71933	72097	-5.85131	-	0	ID=RBOZZYSD_CDS_0107;phrog=7357;top_hit=NC_027119_p124;locus_tag=RBOZZYSD_CDS_0107;function=unknown function;product=hypothetical protein
BASUE2_2	PHANOTATE	CDS	72087	72350	-140.869	-	0	ID=RBOZZYSD_CDS_0108;phrog=4600;top_hit=NC_023856_p77;locus_tag=RBOZZYSD_CDS_0108;function=unknown function;product=hypothetical protein
BASUE2_2	PHANOTATE	CDS	72428	73852	-1.33503e+10	-	0	ID=RBOZZYSD_CDS_0109;phrog=114;top_hit=NC_019913_p32;locus_tag=RBOZZYSD_CDS_0109;function=DNA, RNA and nucleotide metabolism;product=ATP-dependent DNA ligase
BASUE2_2	PHANOTATE	CDS	73914	74252	-37.6071	-	0	ID=RBOZZYSD_CDS_0110;phrog=5022;top_hit=AP018399_p88;locus_tag=RBOZZYSD_CDS_0110;function=unknown function;product=hypothetical protein
BASUE2_2	PHANOTATE	CDS	74254	74463	-15.4893	-	0	ID=RBOZZYSD_CDS_0111;phrog=4789;top_hit=NC_029042_p217;locus_tag=RBOZZYSD_CDS_0111;function=unknown function;product=hypothetical protein
BASUE2_2	PHANOTATE	CDS	74463	74579	-7.76714	-	0	ID=RBOZZYSD_CDS_0112;phrog=6569;top_hit=NC_019910_p125;locus_tag=RBOZZYSD_CDS_0112;function=unknown function;product=hypothetical protein
BASUE2_2	PHANOTATE	CDS	74576	75769	-2.36875e+08	-	0	ID=RBOZZYSD_CDS_0113;phrog=2319;top_hit=MF360958_p41;locus_tag=RBOZZYSD_CDS_0113;function=unknown function;product=hypothetical protein
BASUE2_2	PHANOTATE	CDS	75738	75866	-0.313344	-	0	ID=RBOZZYSD_CDS_0114;phrog=No_PHROG;top_hit=No_PHROG;locus_tag=RBOZZYSD_CDS_0114;function=unknown function;product=hypothetical protein
BASUE2_2	PHANOTATE	CDS	75887	76189	-78.4094	-	0	ID=RBOZZYSD_CDS_0115;phrog=639;top_hit=NC_023568_p222;locus_tag=RBOZZYSD_CDS_0115;function=transcription regulation;product=transcriptional regulator
BASUE2_2	PHANOTATE	CDS	76202	76534	-372.731	-	0	ID=RBOZZYSD_CDS_0116;phrog=3733;top_hit=NC_015296_p53;locus_tag=RBOZZYSD_CDS_0116;function=unknown function;product=hypothetical protein
BASUE2_2	PHANOTATE	CDS	76598	78022	-6.45716e+10	-	0	ID=RBOZZYSD_CDS_0117;phrog=19;top_hit=p414569 VI_10123;locus_tag=RBOZZYSD_CDS_0117;function=DNA, RNA and nucleotide metabolism;product=DnaB-like replicative helicase
BASUE2_2	PHANOTATE	CDS	78029	78358	-218.597	-	0	ID=RBOZZYSD_CDS_0118;phrog=3998;top_hit=KY630163_p64;locus_tag=RBOZZYSD_CDS_0118;function=unknown function;product=hypothetical protein
BASUE2_2	PHANOTATE	CDS	78336	79421	-6.9936e+07	-	0	ID=RBOZZYSD_CDS_0119;phrog=8337;top_hit=NC_028762_p33;locus_tag=RBOZZYSD_CDS_0119;function=DNA, RNA and nucleotide metabolism;product=DNA repair protein
BASUE2_2	PHANOTATE	CDS	79406	79936	-8106.58	-	0	ID=RBOZZYSD_CDS_0120;phrog=3839;top_hit=NC_024122_p40;locus_tag=RBOZZYSD_CDS_0120;function=unknown function;product=hypothetical protein
BASUE2_2	PHANOTATE	CDS	79936	80481	-4801.07	-	0	ID=RBOZZYSD_CDS_0121;phrog=173;top_hit=KX961631_p3;locus_tag=RBOZZYSD_CDS_0121;function=DNA, RNA and nucleotide metabolism;product=nucleoside triphosphate pyrophosphohydrolase
BASUE2_2	PHANOTATE	CDS	80478	81047	-7293.25	-	0	ID=RBOZZYSD_CDS_0122;phrog=139;top_hit=KX507046_p83;locus_tag=RBOZZYSD_CDS_0122;function=other;product=deoxynucleoside monophosphate kinase
BASUE2_2	PHANOTATE	CDS	81044	82084	-1.58521e+06	-	0	ID=RBOZZYSD_CDS_0123;phrog=3676;top_hit=NC_024122_p37;locus_tag=RBOZZYSD_CDS_0123;function=DNA, RNA and nucleotide metabolism;product=thymidylate synthase
BASUE2_2	PHANOTATE	CDS	82084	82746	-10424.9	-	0	ID=RBOZZYSD_CDS_0124;phrog=800;top_hit=KU356689_p12;locus_tag=RBOZZYSD_CDS_0124;function=head and packaging;product=terminase small subunit
BASUE2_2	PHANOTATE	CDS	82819	83778	-1.29907e+06	-	0	ID=RBOZZYSD_CDS_0125;phrog=3905;top_hit=MF001362_p57;locus_tag=RBOZZYSD_CDS_0125;function=unknown function;product=hypothetical protein
BASUE2_2	PHANOTATE	CDS	83738	83902	-1.3775	-	0	ID=RBOZZYSD_CDS_0126;phrog=No_PHROG;top_hit=No_PHROG;locus_tag=RBOZZYSD_CDS_0126;function=unknown function;product=hypothetical protein
BASUE2_2	PHANOTATE	CDS	83952	84239	-578.185	-	0	ID=RBOZZYSD_CDS_0127;phrog=4562;top_hit=MF001362_p58;locus_tag=RBOZZYSD_CDS_0127;function=unknown function;product=hypothetical protein
BASUE2_2	PHANOTATE	CDS	84257	85003	-452026	-	0	ID=RBOZZYSD_CDS_0128;phrog=4253;top_hit=KM209228_p46;locus_tag=RBOZZYSD_CDS_0128;function=unknown function;product=hypothetical protein
BASUE2_2	PHANOTATE	CDS	85065	85769	-513422	-	0	ID=RBOZZYSD_CDS_0129;phrog=429;top_hit=NC_015251_p115;locus_tag=RBOZZYSD_CDS_0129;function=DNA, RNA and nucleotide metabolism;product=DNA end protector
BASUE2_2	PHANOTATE	CDS	85629	86765	-4.10448e+06	+	0	ID=RBOZZYSD_CDS_0130;phrog=3629;top_hit=MF001362_p61;locus_tag=RBOZZYSD_CDS_0130;function=tail;product=tail tube protein
BASUE2_2	PHANOTATE	CDS	86793	87824	-1.08146e+06	-	0	ID=RBOZZYSD_CDS_0131;phrog=224;top_hit=KX349247_p3;locus_tag=RBOZZYSD_CDS_0131;function=DNA, RNA and nucleotide metabolism;product=single strand DNA binding protein
BASUE2_2	PHANOTATE	CDS	87921	88160	-107.59	-	0	ID=RBOZZYSD_CDS_0132;phrog=4100;top_hit=MF285619_p153;locus_tag=RBOZZYSD_CDS_0132;function=unknown function;product=hypothetical protein
BASUE2_2	PHANOTATE	CDS	88170	88472	-188.975	-	0	ID=RBOZZYSD_CDS_0133;phrog=254;top_hit=NC_031095_p150;locus_tag=RBOZZYSD_CDS_0133;function=transcription regulation;product=late promoter transcriptional regulator
BASUE2_2	PHANOTATE	CDS	88637	88933	-110.459	-	0	ID=RBOZZYSD_CDS_0134;phrog=4696;top_hit=KX171211_p93;locus_tag=RBOZZYSD_CDS_0134;function=unknown function;product=hypothetical protein
BASUE2_2	PHANOTATE	CDS	88926	89537	-36065.7	-	0	ID=RBOZZYSD_CDS_0135;phrog=159;top_hit=p35032 VI_04131;locus_tag=RBOZZYSD_CDS_0135;function=DNA, RNA and nucleotide metabolism;product=RuvC-like Holliday junction resolvase
BASUE2_2	PHANOTATE	CDS	89575	90129	-31837.3	-	0	ID=RBOZZYSD_CDS_0136;phrog=3801;top_hit=MF001362_p68;locus_tag=RBOZZYSD_CDS_0136;function=unknown function;product=hypothetical protein
BASUE2_2	PHANOTATE	CDS	90038	90562	-5793.26	-	0	ID=RBOZZYSD_CDS_0137;phrog=3957;top_hit=NC_029042_p187;locus_tag=RBOZZYSD_CDS_0137;function=unknown function;product=hypothetical protein
BASUE2_2	PHANOTATE	CDS	90612	91415	-1.13878e+06	+	0	ID=RBOZZYSD_CDS_0138;phrog=150;top_hit=NC_029000_p129;locus_tag=RBOZZYSD_CDS_0138;function=tail;product=baseplate hub
BASUE2_2	PHANOTATE	CDS	91448	91576	-4.62156	+	0	ID=RBOZZYSD_CDS_0139;phrog=9633;top_hit=NC_013693_p75;locus_tag=RBOZZYSD_CDS_0139;function=unknown function;product=hypothetical protein
BASUE2_2	PHANOTATE	CDS	91708	91818	-1.29103	+	0	ID=RBOZZYSD_CDS_0140;phrog=No_PHROG;top_hit=No_PHROG;locus_tag=RBOZZYSD_CDS_0140;function=unknown function;product=hypothetical protein
BASUE2_2	PHANOTATE	CDS	91922	93547	-1.36314e+07	+	0	ID=RBOZZYSD_CDS_0141;phrog=430;top_hit=KY979132_p49;locus_tag=RBOZZYSD_CDS_0141;function=tail;product=baseplate hub subunit and tail lysozyme
BASUE2_2	PHANOTATE	CDS	93612	93992	-308.128	+	0	ID=RBOZZYSD_CDS_0142;phrog=261;top_hit=KU686208_p77;locus_tag=RBOZZYSD_CDS_0142;function=tail;product=baseplate wedge subunit
BASUE2_2	PHANOTATE	CDS	93993	94331	-406.003	-	0	ID=RBOZZYSD_CDS_0143;phrog=6103;top_hit=NC_013693_p78;locus_tag=RBOZZYSD_CDS_0143;function=unknown function;product=hypothetical protein
BASUE2_2	PHANOTATE	CDS	94333	94794	-3581.68	-	0	ID=RBOZZYSD_CDS_0144;phrog=3902;top_hit=MG973030_p64;locus_tag=RBOZZYSD_CDS_0144;function=unknown function;product=hypothetical protein
BASUE2_2	PHANOTATE	CDS	94787	95029	-28.8019	-	0	ID=RBOZZYSD_CDS_0145;phrog=5206;top_hit=NC_015296_p80;locus_tag=RBOZZYSD_CDS_0145;function=unknown function;product=hypothetical protein
BASUE2_2	PHANOTATE	CDS	95134	95520	-113.172	-	0	ID=RBOZZYSD_CDS_0146;phrog=32429;top_hit=KX171211_p83;locus_tag=RBOZZYSD_CDS_0146;function=unknown function;product=hypothetical protein
BASUE2_2	PHANOTATE	CDS	95623	95847	-45.9568	-	0	ID=RBOZZYSD_CDS_0147;phrog=No_PHROG;top_hit=No_PHROG;locus_tag=RBOZZYSD_CDS_0147;function=unknown function;product=hypothetical protein
BASUE2_2	PHANOTATE	CDS	95857	96960	-2.17426e+06	-	0	ID=RBOZZYSD_CDS_0148;phrog=10582;top_hit=MF001354_p123;locus_tag=RBOZZYSD_CDS_0148;function=DNA, RNA and nucleotide metabolism;product=ribonucleotide reductase class Ia beta subunit
BASUE2_2	PHANOTATE	CDS	97031	99358	-384857093218725	-	0	ID=RBOZZYSD_CDS_0149;phrog=3844;top_hit=KX507046_p55;locus_tag=RBOZZYSD_CDS_0149;function=moron, auxiliary metabolic gene and host takeover;product=NrdA-like aerobic NDP reductase large subunit
BASUE2_2	PHANOTATE	CDS	99392	100231	-154045	-	0	ID=RBOZZYSD_CDS_0150;phrog=170;top_hit=KT995480_p45;locus_tag=RBOZZYSD_CDS_0150;function=other;product=PhoH-like phosphate starvation-inducible
BASUE2_2	PHANOTATE	CDS	100339	101133	-25453.3	-	0	ID=RBOZZYSD_CDS_0151;phrog=1224;top_hit=p169005 VI_01095;locus_tag=RBOZZYSD_CDS_0151;function=head and packaging;product=endolysin
BASUE2_2	PHANOTATE	CDS	101201	101536	-118.054	-	0	ID=RBOZZYSD_CDS_0152;phrog=25746;top_hit=NC_023856_p42;locus_tag=RBOZZYSD_CDS_0152;function=unknown function;product=hypothetical protein
BASUE2_2	PHANOTATE	CDS	101555	101647	-1.41354	+	0	ID=RBOZZYSD_CDS_0153;phrog=No_PHROG;top_hit=No_PHROG;locus_tag=RBOZZYSD_CDS_0153;function=unknown function;product=hypothetical protein
BASUE2_2	PHANOTATE	CDS	101720	102346	-1742.54	+	0	ID=RBOZZYSD_CDS_0154;phrog=No_PHROG;top_hit=No_PHROG;locus_tag=RBOZZYSD_CDS_0154;function=unknown function;product=hypothetical protein
BASUE2_2	PHANOTATE	CDS	102315	102404	-0.216893	+	0	ID=RBOZZYSD_CDS_0155;phrog=No_PHROG;top_hit=No_PHROG;locus_tag=RBOZZYSD_CDS_0155;function=unknown function;product=hypothetical protein
BASUE2_2	PHANOTATE	CDS	102465	102674	-99.5246	-	0	ID=RBOZZYSD_CDS_0156;phrog=4460;top_hit=NC_029042_p168;locus_tag=RBOZZYSD_CDS_0156;function=unknown function;product=hypothetical protein
BASUE2_2	PHANOTATE	CDS	102671	103735	-5.37466e+07	-	0	ID=RBOZZYSD_CDS_0157;phrog=21887;top_hit=NC_029042_p167;locus_tag=RBOZZYSD_CDS_0157;function=DNA, RNA and nucleotide metabolism;product=DNA primase
BASUE2_2	PHANOTATE	CDS	103732	104007	-111.086	-	0	ID=RBOZZYSD_CDS_0158;phrog=22447;top_hit=MG428991_p129;locus_tag=RBOZZYSD_CDS_0158;function=unknown function;product=hypothetical protein
BASUE2_2	PHANOTATE	CDS	104018	104635	-2384.29	-	0	ID=RBOZZYSD_CDS_0159;phrog=631;top_hit=p290492 VI_08668;locus_tag=RBOZZYSD_CDS_0159;function=unknown function;product=hypothetical protein
BASUE2_2	PHANOTATE	CDS	104699	105052	-263.405	-	0	ID=RBOZZYSD_CDS_0160;phrog=858;top_hit=NC_027364_p55;locus_tag=RBOZZYSD_CDS_0160;function=transcription regulation;product=starvation-inducible transcriptional regulator
BASUE2_2	PHANOTATE	CDS	105030	105398	-109.56	+	0	ID=RBOZZYSD_CDS_0161;phrog=No_PHROG;top_hit=No_PHROG;locus_tag=RBOZZYSD_CDS_0161;function=unknown function;product=hypothetical protein
BASUE2_2	PHANOTATE	CDS	105354	105923	-6403.57	-	0	ID=RBOZZYSD_CDS_0162;phrog=4048;top_hit=KX147096_p178;locus_tag=RBOZZYSD_CDS_0162;function=unknown function;product=hypothetical protein
BASUE2_2	PHANOTATE	CDS	105975	108704	-1.23233e+16	-	0	ID=RBOZZYSD_CDS_0163;phrog=3867;top_hit=NC_020083_p116;locus_tag=RBOZZYSD_CDS_0163;function=unknown function;product=hypothetical protein
BASUE2_2	PHANOTATE	CDS	108773	109048	-40.8923	-	0	ID=RBOZZYSD_CDS_0164;phrog=5704;top_hit=MG428990_p128;locus_tag=RBOZZYSD_CDS_0164;function=unknown function;product=hypothetical protein
BASUE2_2	PHANOTATE	CDS	109153	109791	-2399.04	-	0	ID=RBOZZYSD_CDS_0165;phrog=3923;top_hit=NC_020083_p113;locus_tag=RBOZZYSD_CDS_0165;function=unknown function;product=hypothetical protein
BASUE2_2	PHANOTATE	CDS	109791	110408	-2230.34	-	0	ID=RBOZZYSD_CDS_0166;phrog=600;top_hit=NC_029013_p55;locus_tag=RBOZZYSD_CDS_0166;function=unknown function;product=unknown function
BASUE2_2	PHANOTATE	CDS	110505	110789	-668.307	-	0	ID=RBOZZYSD_CDS_0167;phrog=4165;top_hit=NC_015296_p98;locus_tag=RBOZZYSD_CDS_0167;function=unknown function;product=hypothetical protein
BASUE2_2	PHANOTATE	CDS	110770	111099	-159.372	-	0	ID=RBOZZYSD_CDS_0168;phrog=464;top_hit=NC_012635_p229;locus_tag=RBOZZYSD_CDS_0168;function=unknown function;product=unknown function
BASUE2_2	PHANOTATE	CDS	111096	111404	-52.7086	-	0	ID=RBOZZYSD_CDS_0169;phrog=4651;top_hit=NC_029000_p10;locus_tag=RBOZZYSD_CDS_0169;function=unknown function;product=hypothetical protein
BASUE2_2	PHANOTATE	CDS	111408	113741	-8.2136e+17	-	0	ID=RBOZZYSD_CDS_0170;phrog=77;top_hit=p104273 VI_00628;locus_tag=RBOZZYSD_CDS_0170;function=DNA, RNA and nucleotide metabolism;product=SbcC-like subunit of palindrome specific endonuclease
BASUE2_2	PHANOTATE	CDS	113744	114859	-2.19388e+09	-	0	ID=RBOZZYSD_CDS_0171;phrog=100;top_hit=NC_031107_p32;locus_tag=RBOZZYSD_CDS_0171;function=DNA, RNA and nucleotide metabolism;product=SbcD-like subunit of palindrome specific endonuclease
BASUE2_2	PHANOTATE	CDS	114846	115637	-1.64479e+06	-	0	ID=RBOZZYSD_CDS_0172;phrog=234;top_hit=KJ019099_p146;locus_tag=RBOZZYSD_CDS_0172;function=transcription regulation;product=late sigma transcription factor
BASUE2_2	PHANOTATE	CDS	115649	116176	-451.077	-	0	ID=RBOZZYSD_CDS_0173;phrog=531;top_hit=p6423 VI_10133;locus_tag=RBOZZYSD_CDS_0173;function=DNA, RNA and nucleotide metabolism;product=Rnase H
BASUE2_2	PHANOTATE	CDS	116219	116986	-169339	+	0	ID=RBOZZYSD_CDS_0174;phrog=3833;top_hit=KY630163_p11;locus_tag=RBOZZYSD_CDS_0174;function=unknown function;product=hypothetical protein
BASUE2_2	PHANOTATE	CDS	116983	118647	-7.96714e+10	-	0	ID=RBOZZYSD_CDS_0175;phrog=2488;top_hit=NC_005361_p10;locus_tag=RBOZZYSD_CDS_0175;function=DNA, RNA and nucleotide metabolism;product=DNA helicase
BASUE2_2	PHANOTATE	CDS	118840	119118	-98.099	-	0	ID=RBOZZYSD_CDS_0176;phrog=379;top_hit=KY554777_p175;locus_tag=RBOZZYSD_CDS_0176;function=DNA, RNA and nucleotide metabolism;product=DNA binding protein
BASUE2_2	PHANOTATE	CDS	119202	119993	-123606	-	0	ID=RBOZZYSD_CDS_0177;phrog=200;top_hit=p13345 VI_10141;locus_tag=RBOZZYSD_CDS_0177;function=other;product=lipoprotein
BASUE2_2	PHANOTATE	CDS	119993	120202	-2.69066	-	0	ID=RBOZZYSD_CDS_0178;phrog=11680;top_hit=NC_016073_p103;locus_tag=RBOZZYSD_CDS_0178;function=unknown function;product=hypothetical protein
BASUE2_2	PHANOTATE	CDS	120199	120519	-759.299	-	0	ID=RBOZZYSD_CDS_0179;phrog=1510;top_hit=p67131 VI_07037;locus_tag=RBOZZYSD_CDS_0179;function=moron, auxiliary metabolic gene and host takeover;product=superinfection exclusion
BASUE2_2	PHANOTATE	CDS	120509	120796	-246.915	-	0	ID=RBOZZYSD_CDS_0180;phrog=5397;top_hit=NC_013693_p115;locus_tag=RBOZZYSD_CDS_0180;function=unknown function;product=hypothetical protein
BASUE2_2	PHANOTATE	CDS	120798	121466	-10097.4	-	0	ID=RBOZZYSD_CDS_0181;phrog=5426;top_hit=NC_016570_p103;locus_tag=RBOZZYSD_CDS_0181;function=unknown function;product=hypothetical protein
BASUE2_2	PHANOTATE	CDS	121523	122314	-8732.93	-	0	ID=RBOZZYSD_CDS_0182;phrog=3828;top_hit=NC_016570_p104;locus_tag=RBOZZYSD_CDS_0182;function=unknown function;product=hypothetical protein
BASUE2_2	PHANOTATE	CDS	122365	122685	-98.7506	-	0	ID=RBOZZYSD_CDS_0183;phrog=3843;top_hit=KX171211_p51;locus_tag=RBOZZYSD_CDS_0183;function=lysis;product=Rz-like spanin
BASUE2_2	PHANOTATE	CDS	122682	123371	-9496.2	-	0	ID=RBOZZYSD_CDS_0184;phrog=4260;top_hit=KM209228_p97;locus_tag=RBOZZYSD_CDS_0184;function=unknown function;product=hypothetical protein
BASUE2_2	PHANOTATE	CDS	123456	123905	-2643.2	-	0	ID=RBOZZYSD_CDS_0185;phrog=2859;top_hit=KM209228_p98;locus_tag=RBOZZYSD_CDS_0185;function=unknown function;product=hypothetical protein
BASUE2_2	PHANOTATE	CDS	123943	124221	-82.1139	-	0	ID=RBOZZYSD_CDS_0186;phrog=4458;top_hit=NC_019910_p56;locus_tag=RBOZZYSD_CDS_0186;function=unknown function;product=hypothetical protein
BASUE2_2	PHANOTATE	CDS	124274	124780	-1530.91	-	0	ID=RBOZZYSD_CDS_0187;phrog=832;top_hit=NC_031128_p61;locus_tag=RBOZZYSD_CDS_0187;function=DNA, RNA and nucleotide metabolism;product=RNA polymerase ADP-ribosylase
BASUE2_2	PHANOTATE	CDS	124840	125079	-35.8084	-	0	ID=RBOZZYSD_CDS_0188;phrog=804;top_hit=p369127 VI_08797;locus_tag=RBOZZYSD_CDS_0188;function=unknown function;product=hypothetical protein
BASUE2_2	PHANOTATE	CDS	125203	125520	-687.974	-	0	ID=RBOZZYSD_CDS_0189;phrog=4154;top_hit=NC_019910_p53;locus_tag=RBOZZYSD_CDS_0189;function=moron, auxiliary metabolic gene and host takeover;product=acyl carrier protein
BASUE2_2	PHANOTATE	CDS	125558	127879	-4377047688935530	-	0	ID=RBOZZYSD_CDS_0190;phrog=2426;top_hit=NC_019910_p52;locus_tag=RBOZZYSD_CDS_0190;function=unknown function;product=hypothetical protein
BASUE2_2	PHANOTATE	CDS	127892	128023	-1.59456	+	0	ID=RBOZZYSD_CDS_0191;phrog=No_PHROG;top_hit=No_PHROG;locus_tag=RBOZZYSD_CDS_0191;function=unknown function;product=hypothetical protein
BASUE2_2	PHANOTATE	CDS	128094	128966	-79498.3	-	0	ID=RBOZZYSD_CDS_0192;phrog=4435;top_hit=NC_019452_p120;locus_tag=RBOZZYSD_CDS_0192;function=unknown function;product=hypothetical protein
BASUE2_2	PHANOTATE	CDS	128975	129349	-33.1216	-	0	ID=RBOZZYSD_CDS_0193;phrog=1934;top_hit=NC_009811_p41;locus_tag=RBOZZYSD_CDS_0193;function=unknown function;product=hypothetical protein
BASUE2_2	PHANOTATE	CDS	129409	129780	-812.454	-	0	ID=RBOZZYSD_CDS_0194;phrog=2018;top_hit=MG983743_p54;locus_tag=RBOZZYSD_CDS_0194;function=unknown function;product=hypothetical protein
BASUE2_2	PHANOTATE	CDS	129819	131837	-114824182771908	-	0	ID=RBOZZYSD_CDS_0195;phrog=1735;top_hit=MG983743_p55;locus_tag=RBOZZYSD_CDS_0195;function=unknown function;product=hypothetical protein
BASUE2_2	PHANOTATE	CDS	131957	132181	-7.92218	-	0	ID=RBOZZYSD_CDS_0196;phrog=19743;top_hit=NC_027119_p38;locus_tag=RBOZZYSD_CDS_0196;function=unknown function;product=hypothetical protein
BASUE2_2	PHANOTATE	CDS	132178	133107	-2.06768e+06	-	0	ID=RBOZZYSD_CDS_0197;phrog=655;top_hit=NC_025419_p99;locus_tag=RBOZZYSD_CDS_0197;function=DNA, RNA and nucleotide metabolism;product=homing endonuclease
BASUE2_2	PHANOTATE	CDS	133167	134369	-3.59799e+07	-	0	ID=RBOZZYSD_CDS_0198;phrog=2396;top_hit=MF668275_p38;locus_tag=RBOZZYSD_CDS_0198;function=unknown function;product=hypothetical protein
BASUE2_2	PHANOTATE	CDS	134439	135395	-2.03021e+06	-	0	ID=RBOZZYSD_CDS_0199;phrog=2144;top_hit=NC_019925_p116;locus_tag=RBOZZYSD_CDS_0199;function=other;product=MazG-like pyrophosphatase
BASUE2_2	PHANOTATE	CDS	135325	135789	-9446.65	-	0	ID=RBOZZYSD_CDS_0200;phrog=242;top_hit=NC_025422_p134;locus_tag=RBOZZYSD_CDS_0200;function=other;product=translation repressor
BASUE2_2	PHANOTATE	CDS	135819	136241	-506.817	-	0	ID=RBOZZYSD_CDS_0201;phrog=225;top_hit=KX879627_p166;locus_tag=RBOZZYSD_CDS_0201;function=DNA, RNA and nucleotide metabolism;product=clamp loader of DNA polymerase
BASUE2_2	PHANOTATE	CDS	136246	137235	-761727	-	0	ID=RBOZZYSD_CDS_0202;phrog=168;top_hit=p26368 VI_12322;locus_tag=RBOZZYSD_CDS_0202;function=DNA, RNA and nucleotide metabolism;product=clamp loader of DNA polymerase
BASUE2_2	PHANOTATE	CDS	137314	137982	-5088.24	-	0	ID=RBOZZYSD_CDS_0203;phrog=223;top_hit=NC_015464_p42;locus_tag=RBOZZYSD_CDS_0203;function=DNA, RNA and nucleotide metabolism;product=DNA polymerase processivity factor
BASUE2_2	PHANOTATE	CDS	138076	138183	-0.0961984	-	0	ID=RBOZZYSD_CDS_0204;phrog=No_PHROG;top_hit=No_PHROG;locus_tag=RBOZZYSD_CDS_0204;function=unknown function;product=hypothetical protein
BASUE2_2	PHANOTATE	CDS	138212	138304	-0.114837	+	0	ID=RBOZZYSD_CDS_0205;phrog=No_PHROG;top_hit=No_PHROG;locus_tag=RBOZZYSD_CDS_0205;function=unknown function;product=hypothetical protein
BASUE2_2	PHANOTATE	CDS	138321	138686	-279.788	+	0	ID=RBOZZYSD_CDS_0206;phrog=4255;top_hit=NC_025452_p85;locus_tag=RBOZZYSD_CDS_0206;function=unknown function;product=hypothetical protein
BASUE2_2	PHANOTATE	CDS	138692	140191	-6.37283e+11	-	0	ID=RBOZZYSD_CDS_0207;phrog=9690;top_hit=MF001355_p164;locus_tag=RBOZZYSD_CDS_0207;function=DNA, RNA and nucleotide metabolism;product=DNA helicase
BASUE2_2	PHANOTATE	CDS	140221	140967	-178797	-	0	ID=RBOZZYSD_CDS_0208;phrog=298;top_hit=KX349270_p213;locus_tag=RBOZZYSD_CDS_0208;function=DNA, RNA and nucleotide metabolism;product=exonuclease
BASUE2_2	PHANOTATE	CDS	140967	141422	-12185.5	-	0	ID=RBOZZYSD_CDS_0209;phrog=231;top_hit=NC_031922_p115;locus_tag=RBOZZYSD_CDS_0209;function=DNA, RNA and nucleotide metabolism;product=UvsY-like recombination mediator
BASUE2_2	PHANOTATE	CDS	141461	141958	-1169.57	-	0	ID=RBOZZYSD_CDS_0210;phrog=45;top_hit=KY290955_p113;locus_tag=RBOZZYSD_CDS_0210;function=tail;product=tail tube
BASUE2_2	PHANOTATE	CDS	142022	142642	-2150.73	+	0	ID=RBOZZYSD_CDS_0211;phrog=3832;top_hit=MG428991_p74;locus_tag=RBOZZYSD_CDS_0211;function=unknown function;product=hypothetical protein
BASUE2_2	PHANOTATE	CDS	142643	143371	-925.452	-	0	ID=RBOZZYSD_CDS_0212;phrog=2114;top_hit=MF327003_p26;locus_tag=RBOZZYSD_CDS_0212;function=unknown function;product=hypothetical protein
BASUE2_2	PHANOTATE	CDS	143403	143657	-112.58	-	0	ID=RBOZZYSD_CDS_0213;phrog=4845;top_hit=MG383452_p34;locus_tag=RBOZZYSD_CDS_0213;function=unknown function;product=hypothetical protein
BASUE2_2	PHANOTATE	CDS	143608	144030	-1506.12	-	0	ID=RBOZZYSD_CDS_0214;phrog=289;top_hit=MF155946_p88;locus_tag=RBOZZYSD_CDS_0214;function=other;product=GTP-binding domain
BASUE2_2	PHANOTATE	CDS	144036	144353	-19.4989	-	0	ID=RBOZZYSD_CDS_0215;phrog=4663;top_hit=KM209228_p129;locus_tag=RBOZZYSD_CDS_0215;function=unknown function;product=hypothetical protein
BASUE2_2	PHANOTATE	CDS	144422	144886	-863.137	-	0	ID=RBOZZYSD_CDS_0216;phrog=6516;top_hit=KY630163_p180;locus_tag=RBOZZYSD_CDS_0216;function=unknown function;product=hypothetical protein
BASUE2_2	PHANOTATE	CDS	144990	145226	-14.8863	-	0	ID=RBOZZYSD_CDS_0217;phrog=1578;top_hit=p67129 VI_07037;locus_tag=RBOZZYSD_CDS_0217;function=unknown function;product=hypothetical protein
BASUE2_2	PHANOTATE	CDS	145223	145597	-103.58	-	0	ID=RBOZZYSD_CDS_0218;phrog=7702;top_hit=KY630163_p178;locus_tag=RBOZZYSD_CDS_0218;function=unknown function;product=hypothetical protein
BASUE2_2	PHANOTATE	CDS	145609	146055	-1243.61	-	0	ID=RBOZZYSD_CDS_0219;phrog=4181;top_hit=MG266157_p133;locus_tag=RBOZZYSD_CDS_0219;function=unknown function;product=hypothetical protein
BASUE2_2	PHANOTATE	CDS	146071	146394	-281.559	-	0	ID=RBOZZYSD_CDS_0220;phrog=7113;top_hit=KX147096_p126;locus_tag=RBOZZYSD_CDS_0220;function=unknown function;product=hypothetical protein
BASUE2_2	PHANOTATE	CDS	146538	146852	-153.503	-	0	ID=RBOZZYSD_CDS_0221;phrog=6238;top_hit=NC_025452_p101;locus_tag=RBOZZYSD_CDS_0221;function=unknown function;product=hypothetical protein
BASUE2_2	PHANOTATE	CDS	146940	147176	-14.2377	-	0	ID=RBOZZYSD_CDS_0222;phrog=4365;top_hit=MG428990_p67;locus_tag=RBOZZYSD_CDS_0222;function=unknown function;product=hypothetical protein
BASUE2_2	PHANOTATE	CDS	147271	148593	-7.39524e+06	-	0	ID=RBOZZYSD_CDS_0223;phrog=138;top_hit=KX349228_p120;locus_tag=RBOZZYSD_CDS_0223;function=head and packaging;product=major head protein
BASUE2_2	PHANOTATE	CDS	148685	149524	-1.61271e+06	-	0	ID=RBOZZYSD_CDS_0224;phrog=237;top_hit=KJ019165_p100;locus_tag=RBOZZYSD_CDS_0224;function=head and packaging;product=head scaffolding protein
BASUE2_2	PHANOTATE	CDS	149571	150236	-6512.16	-	0	ID=RBOZZYSD_CDS_0225;phrog=207;top_hit=KU873925_p107;locus_tag=RBOZZYSD_CDS_0225;function=head and packaging;product=head maturation protease
BASUE2_2	PHANOTATE	CDS	150247	150561	-96.3213	-	0	ID=RBOZZYSD_CDS_0226;phrog=3503;top_hit=NC_013697_p41;locus_tag=RBOZZYSD_CDS_0226;function=head and packaging;product=head scaffolding protein
BASUE2_2	PHANOTATE	CDS	150573	150743	-6.68338	-	0	ID=RBOZZYSD_CDS_0227;phrog=4097;top_hit=MF285619_p62;locus_tag=RBOZZYSD_CDS_0227;function=unknown function;product=hypothetical protein
BASUE2_2	PHANOTATE	CDS	150785	152467	-8.10946e+12	-	0	ID=RBOZZYSD_CDS_0228;phrog=213;top_hit=NC_019401_p248;locus_tag=RBOZZYSD_CDS_0228;function=head and packaging;product=portal protein
BASUE2_2	PHANOTATE	CDS	152535	153068	-437.817	-	0	ID=RBOZZYSD_CDS_0229;phrog=45;top_hit=KY290955_p113;locus_tag=RBOZZYSD_CDS_0229;function=tail;product=tail tube
BASUE2_2	PHANOTATE	CDS	153099	153557	-3027.83	-	0	ID=RBOZZYSD_CDS_0230;phrog=5123;top_hit=MG428991_p51;locus_tag=RBOZZYSD_CDS_0230;function=DNA, RNA and nucleotide metabolism;product=homing endonuclease with GIY-YIG motif
BASUE2_2	PHANOTATE	CDS	153614	155509	-4.73334e+08	-	0	ID=RBOZZYSD_CDS_0231;phrog=23;top_hit=NC_017972_p61;locus_tag=RBOZZYSD_CDS_0231;function=tail;product=tail sheath
BASUE2_2	PHANOTATE	CDS	155562	157772	-635451368984893	-	0	ID=RBOZZYSD_CDS_0232;phrog=36964;top_hit=NC_027399_p27;locus_tag=RBOZZYSD_CDS_0232;function=head and packaging;product=terminase large subunit
BASUE2_2	PHANOTATE	CDS	157785	157874	-3.31675	-	0	ID=RBOZZYSD_CDS_0233;phrog=No_PHROG;top_hit=No_PHROG;locus_tag=RBOZZYSD_CDS_0233;function=unknown function;product=hypothetical protein

## Sheet: BASUE7
BASUE7_1	PHANOTATE	CDS	1	276	-17.8423	-	0	ID=WPVWUZSG_CDS_0001;phrog=2794;top_hit=NC_028774_p43;locus_tag=WPVWUZSG_CDS_0001;function=unknown function;product=hypothetical protein
BASUE7_1	PHANOTATE	CDS	281	1849	-4.46647e+11	-	0	ID=WPVWUZSG_CDS_0002;phrog=2373;top_hit=NC_010495_p48;locus_tag=WPVWUZSG_CDS_0002;function=DNA, RNA and nucleotide metabolism;product=DNA helicase
BASUE7_1	PHANOTATE	CDS	1926	2342	-2155.34	-	0	ID=WPVWUZSG_CDS_0003;phrog=2684;top_hit=NC_026010_p83;locus_tag=WPVWUZSG_CDS_0003;function=unknown function;product=hypothetical protein
BASUE7_1	PHANOTATE	CDS	2423	2632	-58.1087	-	0	ID=WPVWUZSG_CDS_0004;phrog=9085;top_hit=NC_026010_p82;locus_tag=WPVWUZSG_CDS_0004;function=unknown function;product=hypothetical protein
BASUE7_1	PHANOTATE	CDS	2636	2860	-9.0913	-	0	ID=WPVWUZSG_CDS_0005;phrog=4344;top_hit=NC_026010_p81;locus_tag=WPVWUZSG_CDS_0005;function=unknown function;product=hypothetical protein
BASUE7_1	PHANOTATE	CDS	2937	3080	-37.7746	-	0	ID=WPVWUZSG_CDS_0006;phrog=3955;top_hit=MG004687_p59;locus_tag=WPVWUZSG_CDS_0006;function=unknown function;product=hypothetical protein
BASUE7_1	PHANOTATE	CDS	3077	3397	-441.485	-	0	ID=WPVWUZSG_CDS_0007;phrog=10555;top_hit=KX828710_p75;locus_tag=WPVWUZSG_CDS_0007;function=unknown function;product=hypothetical protein
BASUE7_1	PHANOTATE	CDS	3415	3615	-35.6881	-	0	ID=WPVWUZSG_CDS_0008;phrog=6503;top_hit=NC_031026_p67;locus_tag=WPVWUZSG_CDS_0008;function=unknown function;product=hypothetical protein
BASUE7_1	PHANOTATE	CDS	3608	3979	-1170.42	-	0	ID=WPVWUZSG_CDS_0009;phrog=11577;top_hit=KU194206_p74;locus_tag=WPVWUZSG_CDS_0009;function=unknown function;product=hypothetical protein
BASUE7_1	PHANOTATE	CDS	4055	4240	-134.142	-	0	ID=WPVWUZSG_CDS_0010;phrog=3623;top_hit=NC_012749_p20;locus_tag=WPVWUZSG_CDS_0010;function=unknown function;product=hypothetical protein
BASUE7_1	PHANOTATE	CDS	4256	4441	-148.339	-	0	ID=WPVWUZSG_CDS_0011;phrog=7717;top_hit=NC_025425_p119;locus_tag=WPVWUZSG_CDS_0011;function=unknown function;product=hypothetical protein
BASUE7_1	PHANOTATE	CDS	4502	5206	-21384.8	-	0	ID=WPVWUZSG_CDS_0012;phrog=757;top_hit=KX495186_p170;locus_tag=WPVWUZSG_CDS_0012;function=other;product=DNA methyltransferase
BASUE7_1	PHANOTATE	CDS	5232	5348	-3.00369	+	0	ID=WPVWUZSG_CDS_0013;phrog=No_PHROG;top_hit=No_PHROG;locus_tag=WPVWUZSG_CDS_0013;function=unknown function;product=hypothetical protein
BASUE7_1	PHANOTATE	CDS	5355	5477	-3.73437	+	0	ID=WPVWUZSG_CDS_0014;phrog=No_PHROG;top_hit=No_PHROG;locus_tag=WPVWUZSG_CDS_0014;function=unknown function;product=hypothetical protein
BASUE7_1	PHANOTATE	CDS	5589	5789	-65.8772	+	0	ID=WPVWUZSG_CDS_0015;phrog=No_PHROG;top_hit=No_PHROG;locus_tag=WPVWUZSG_CDS_0015;function=unknown function;product=hypothetical protein
BASUE7_1	PHANOTATE	CDS	5894	6409	-17274.4	+	0	ID=WPVWUZSG_CDS_0016;phrog=11083;top_hit=NC_005833_p1;locus_tag=WPVWUZSG_CDS_0016;function=unknown function;product=hypothetical protein
BASUE7_1	PHANOTATE	CDS	6422	6682	-217.686	+	0	ID=WPVWUZSG_CDS_0017;phrog=35072;top_hit=NC_019725_p10;locus_tag=WPVWUZSG_CDS_0017;function=unknown function;product=hypothetical protein
BASUE7_1	PHANOTATE	CDS	6755	6949	-70.4227	+	0	ID=WPVWUZSG_CDS_0018;phrog=7421;top_hit=NC_019725_p11;locus_tag=WPVWUZSG_CDS_0018;function=unknown function;product=hypothetical protein
BASUE7_1	PHANOTATE	CDS	6952	7419	-2789.43	+	0	ID=WPVWUZSG_CDS_0019;phrog=12951;top_hit=NC_019725_p12;locus_tag=WPVWUZSG_CDS_0019;function=unknown function;product=hypothetical protein
BASUE7_1	PHANOTATE	CDS	7479	7610	-0.0971925	+	0	ID=WPVWUZSG_CDS_0020;phrog=No_PHROG;top_hit=No_PHROG;locus_tag=WPVWUZSG_CDS_0020;function=unknown function;product=hypothetical protein
BASUE7_1	PHANOTATE	CDS	7639	7869	-37.0102	+	0	ID=WPVWUZSG_CDS_0021;phrog=11449;top_hit=KT321315_p97;locus_tag=WPVWUZSG_CDS_0021;function=unknown function;product=hypothetical protein
BASUE7_1	PHANOTATE	CDS	7876	8103	-17.4325	+	0	ID=WPVWUZSG_CDS_0022;phrog=6080;top_hit=MF415412_p29;locus_tag=WPVWUZSG_CDS_0022;function=unknown function;product=hypothetical protein
BASUE7_1	PHANOTATE	CDS	8100	8210	-7.86266	+	0	ID=WPVWUZSG_CDS_0023;phrog=25570;top_hit=KX828710_p7;locus_tag=WPVWUZSG_CDS_0023;function=unknown function;product=hypothetical protein
BASUE7_1	PHANOTATE	CDS	8210	8380	-48.5379	+	0	ID=WPVWUZSG_CDS_0024;phrog=8628;top_hit=MF093736_p59;locus_tag=WPVWUZSG_CDS_0024;function=unknown function;product=hypothetical protein
BASUE7_1	PHANOTATE	CDS	8452	8940	-10041.6	+	0	ID=WPVWUZSG_CDS_0025;phrog=9595;top_hit=KU194205_p7;locus_tag=WPVWUZSG_CDS_0025;function=unknown function;product=hypothetical protein
BASUE7_1	PHANOTATE	CDS	9012	9518	-28233.5	+	0	ID=WPVWUZSG_CDS_0026;phrog=7116;top_hit=NC_009540_p6;locus_tag=WPVWUZSG_CDS_0026;function=unknown function;product=hypothetical protein
BASUE7_1	PHANOTATE	CDS	9518	9667	-59.237	+	0	ID=WPVWUZSG_CDS_0027;phrog=5579;top_hit=KU194205_p9;locus_tag=WPVWUZSG_CDS_0027;function=unknown function;product=hypothetical protein
BASUE7_1	PHANOTATE	CDS	9775	10008	-22.2554	+	0	ID=WPVWUZSG_CDS_0028;phrog=22491;top_hit=KY780482_p48;locus_tag=WPVWUZSG_CDS_0028;function=unknown function;product=hypothetical protein
BASUE7_1	PHANOTATE	CDS	10008	10214	-23.7311	+	0	ID=WPVWUZSG_CDS_0029;phrog=18601;top_hit=KX828710_p13;locus_tag=WPVWUZSG_CDS_0029;function=unknown function;product=hypothetical protein
BASUE7_1	PHANOTATE	CDS	10198	10485	-172.192	+	0	ID=WPVWUZSG_CDS_0030;phrog=986;top_hit=KX828710_p14;locus_tag=WPVWUZSG_CDS_0030;function=DNA, RNA and nucleotide metabolism;product=RNA-binding protein
BASUE7_1	PHANOTATE	CDS	10482	11120	-81300.9	+	0	ID=WPVWUZSG_CDS_0031;phrog=10580;top_hit=KX828710_p15;locus_tag=WPVWUZSG_CDS_0031;function=unknown function;product=hypothetical protein
BASUE7_1	PHANOTATE	CDS	11174	11284	-13.9124	+	0	ID=WPVWUZSG_CDS_0032;phrog=No_PHROG;top_hit=No_PHROG;locus_tag=WPVWUZSG_CDS_0032;function=unknown function;product=hypothetical protein
BASUE7_1	PHANOTATE	CDS	11269	11487	-20.6097	+	0	ID=WPVWUZSG_CDS_0033;phrog=11330;top_hit=KX828710_p16;locus_tag=WPVWUZSG_CDS_0033;function=unknown function;product=hypothetical protein
BASUE7_1	PHANOTATE	CDS	11545	11991	-11748.1	+	0	ID=WPVWUZSG_CDS_0034;phrog=10642;top_hit=KX828710_p17;locus_tag=WPVWUZSG_CDS_0034;function=unknown function;product=hypothetical protein
BASUE7_1	PHANOTATE	CDS	11982	12077	-0.111544	+	0	ID=WPVWUZSG_CDS_0035;phrog=No_PHROG;top_hit=No_PHROG;locus_tag=WPVWUZSG_CDS_0035;function=unknown function;product=hypothetical protein
BASUE7_1	PHANOTATE	CDS	12074	12277	-145.134	+	0	ID=WPVWUZSG_CDS_0036;phrog=29229;top_hit=NC_026010_p54;locus_tag=WPVWUZSG_CDS_0036;function=unknown function;product=hypothetical protein
BASUE7_1	PHANOTATE	CDS	12277	12810	-54330.3	+	0	ID=WPVWUZSG_CDS_0037;phrog=415;top_hit=NC_014635_p66;locus_tag=WPVWUZSG_CDS_0037;function=other;product=polynucleotide kinase
BASUE7_1	PHANOTATE	CDS	12807	12917	-9.57557	+	0	ID=WPVWUZSG_CDS_0038;phrog=No_PHROG;top_hit=No_PHROG;locus_tag=WPVWUZSG_CDS_0038;function=unknown function;product=hypothetical protein
BASUE7_1	PHANOTATE	CDS	12919	13491	-51074.4	+	0	ID=WPVWUZSG_CDS_0039;phrog=139;top_hit=KX507046_p83;locus_tag=WPVWUZSG_CDS_0039;function=other;product=deoxynucleoside monophosphate kinase
BASUE7_1	PHANOTATE	CDS	13564	13773	-218.735	+	0	ID=WPVWUZSG_CDS_0040;phrog=10456;top_hit=MG049919_p49;locus_tag=WPVWUZSG_CDS_0040;function=unknown function;product=hypothetical protein
BASUE7_1	PHANOTATE	CDS	13770	14114	-2286.02	+	0	ID=WPVWUZSG_CDS_0041;phrog=9709;top_hit=MG049919_p48;locus_tag=WPVWUZSG_CDS_0041;function=unknown function;product=hypothetical protein
BASUE7_1	PHANOTATE	CDS	14114	14344	-519.167	+	0	ID=WPVWUZSG_CDS_0042;phrog=303;top_hit=p344653 VI_03289;locus_tag=WPVWUZSG_CDS_0042;function=unknown function;product=hypothetical protein
BASUE7_1	PHANOTATE	CDS	14344	14547	-11.9105	+	0	ID=WPVWUZSG_CDS_0043;phrog=4927;top_hit=NC_031050_p24;locus_tag=WPVWUZSG_CDS_0043;function=unknown function;product=hypothetical protein
BASUE7_1	PHANOTATE	CDS	14657	14752	-0.143541	+	0	ID=WPVWUZSG_CDS_0044;phrog=No_PHROG;top_hit=No_PHROG;locus_tag=WPVWUZSG_CDS_0044;function=unknown function;product=hypothetical protein
BASUE7_1	PHANOTATE	CDS	14712	14873	-57.4251	+	0	ID=WPVWUZSG_CDS_0045;phrog=6666;top_hit=MF093736_p44;locus_tag=WPVWUZSG_CDS_0045;function=unknown function;product=hypothetical protein
BASUE7_1	PHANOTATE	CDS	14854	15039	-14.661	+	0	ID=WPVWUZSG_CDS_0046;phrog=2919;top_hit=KT825490_p70;locus_tag=WPVWUZSG_CDS_0046;function=unknown function;product=hypothetical protein
BASUE7_1	PHANOTATE	CDS	15041	15268	-21.3219	+	0	ID=WPVWUZSG_CDS_0047;phrog=5976;top_hit=MF093736_p42;locus_tag=WPVWUZSG_CDS_0047;function=unknown function;product=hypothetical protein
BASUE7_1	PHANOTATE	CDS	15265	15360	-0.473949	+	0	ID=WPVWUZSG_CDS_0048;phrog=No_PHROG;top_hit=No_PHROG;locus_tag=WPVWUZSG_CDS_0048;function=unknown function;product=hypothetical protein
BASUE7_1	PHANOTATE	CDS	15353	15877	-19473.5	+	0	ID=WPVWUZSG_CDS_0049;phrog=606;top_hit=NC_011318_p1;locus_tag=WPVWUZSG_CDS_0049;function=head and packaging;product=terminase small subunit
BASUE7_1	PHANOTATE	CDS	15917	17485	-1.2086e+12	+	0	ID=WPVWUZSG_CDS_0050;phrog=38;top_hit=p428778 VI_10880;locus_tag=WPVWUZSG_CDS_0050;function=head and packaging;product=terminase large subunit
BASUE7_1	PHANOTATE	CDS	17489	18823	-3.75929e+10	+	0	ID=WPVWUZSG_CDS_0051;phrog=12751;top_hit=p305174 VI_10042;locus_tag=WPVWUZSG_CDS_0051;function=unknown function;product=hypothetical protein
BASUE7_1	PHANOTATE	CDS	18813	19574	-6447.14	+	0	ID=WPVWUZSG_CDS_0052;phrog=324;top_hit=p327935 VI_06679;locus_tag=WPVWUZSG_CDS_0052;function=head and packaging;product=head morphogenesis
BASUE7_1	PHANOTATE	CDS	19577	20689	-1.85457e+08	+	0	ID=WPVWUZSG_CDS_0053;phrog=530;top_hit=p70477 VI_02625;locus_tag=WPVWUZSG_CDS_0053;function=head and packaging;product=head maturation protease
BASUE7_1	PHANOTATE	CDS	20701	21177	-132.979	+	0	ID=WPVWUZSG_CDS_0054;phrog=1989;top_hit=NC_024784_p7;locus_tag=WPVWUZSG_CDS_0054;function=unknown function;product=hypothetical protein
BASUE7_1	PHANOTATE	CDS	21240	22007	-3506.55	+	0	ID=WPVWUZSG_CDS_0055;phrog=1989;top_hit=NC_024784_p7;locus_tag=WPVWUZSG_CDS_0055;function=unknown function;product=hypothetical protein
BASUE7_1	PHANOTATE	CDS	22099	23058	-1.07761e+06	+	0	ID=WPVWUZSG_CDS_0056;phrog=264;top_hit=p358640 VI_12386;locus_tag=WPVWUZSG_CDS_0056;function=head and packaging;product=major head protein
BASUE7_1	PHANOTATE	CDS	23109	23396	-74.7435	+	0	ID=WPVWUZSG_CDS_0057;phrog=2716;top_hit=NC_028786_p13;locus_tag=WPVWUZSG_CDS_0057;function=unknown function;product=hypothetical protein
BASUE7_1	PHANOTATE	CDS	23441	23851	-677.627	+	0	ID=WPVWUZSG_CDS_0058;phrog=302;top_hit=p289237 VI_09357;locus_tag=WPVWUZSG_CDS_0058;function=head and packaging;product=virion structural protein
BASUE7_1	PHANOTATE	CDS	23851	24222	-436.853	+	0	ID=WPVWUZSG_CDS_0059;phrog=No_PHROG;top_hit=No_PHROG;locus_tag=WPVWUZSG_CDS_0059;function=unknown function;product=hypothetical protein
BASUE7_1	PHANOTATE	CDS	24122	24658	-6231.94	+	0	ID=WPVWUZSG_CDS_0060;phrog=169;top_hit=NC_018454_p37;locus_tag=WPVWUZSG_CDS_0060;function=connector;product=tail completion or Neck1 protein
BASUE7_1	PHANOTATE	CDS	24648	25046	-4639.61	+	0	ID=WPVWUZSG_CDS_0061;phrog=179;top_hit=NC_026610_p50;locus_tag=WPVWUZSG_CDS_0061;function=connector;product=tail terminator
BASUE7_1	PHANOTATE	CDS	25049	25717	-3830.69	+	0	ID=WPVWUZSG_CDS_0062;phrog=584;top_hit=NC_027383_p27;locus_tag=WPVWUZSG_CDS_0062;function=tail;product=major tail protein
BASUE7_1	PHANOTATE	CDS	25832	26149	-712.734	+	0	ID=WPVWUZSG_CDS_0063;phrog=17368;top_hit=NC_027350_p15;locus_tag=WPVWUZSG_CDS_0063;function=tail;product=tail length tape measure protein
BASUE7_1	PHANOTATE	CDS	26124	26225	-0.0653096	+	0	ID=WPVWUZSG_CDS_0064;phrog=No_PHROG;top_hit=No_PHROG;locus_tag=WPVWUZSG_CDS_0064;function=unknown function;product=hypothetical protein
BASUE7_1	PHANOTATE	CDS	26269	26466	-55.7092	+	0	ID=WPVWUZSG_CDS_0065;phrog=17368;top_hit=NC_027350_p15;locus_tag=WPVWUZSG_CDS_0065;function=tail;product=tail length tape measure protein
BASUE7_1	PHANOTATE	CDS	26505	29378	-1.19685e+19	+	0	ID=WPVWUZSG_CDS_0066;phrog=24;top_hit=p178470 VI_05726;locus_tag=WPVWUZSG_CDS_0066;function=tail;product=tail length tape measure protein
BASUE7_1	PHANOTATE	CDS	29381	29734	-182.726	+	0	ID=WPVWUZSG_CDS_0067;phrog=14;top_hit=NC_019721_p14;locus_tag=WPVWUZSG_CDS_0067;function=tail;product=minor tail protein
BASUE7_1	PHANOTATE	CDS	29814	30596	-106534	+	0	ID=WPVWUZSG_CDS_0068;phrog=18;top_hit=p22999 VI_12315;locus_tag=WPVWUZSG_CDS_0068;function=tail;product=minor tail protein
BASUE7_1	PHANOTATE	CDS	30593	31327	-1.67817e+06	+	0	ID=WPVWUZSG_CDS_0069;phrog=30;top_hit=p413732 VI_07955;locus_tag=WPVWUZSG_CDS_0069;function=tail;product=minor tail protein
BASUE7_1	PHANOTATE	CDS	31324	31923	-1208.37	+	0	ID=WPVWUZSG_CDS_0070;phrog=4946;top_hit=p86380 VI_02810;locus_tag=WPVWUZSG_CDS_0070;function=tail;product=tail protein
BASUE7_1	PHANOTATE	CDS	32001	35450	-8.39329e+22	+	0	ID=WPVWUZSG_CDS_0071;phrog=2589;top_hit=p216626 VI_11255;locus_tag=WPVWUZSG_CDS_0071;function=tail;product=tail protein
BASUE7_1	PHANOTATE	CDS	35478	36434	-5173.48	-	0	ID=WPVWUZSG_CDS_0072;phrog=1265;top_hit=p281072 VI_11962;locus_tag=WPVWUZSG_CDS_0072;function=moron, auxiliary metabolic gene and host takeover;product=membrane protein
BASUE7_1	PHANOTATE	CDS	36437	36667	-66.9089	-	0	ID=WPVWUZSG_CDS_0073;phrog=4281;top_hit=NC_019724_p24;locus_tag=WPVWUZSG_CDS_0073;function=unknown function;product=hypothetical protein
BASUE7_1	PHANOTATE	CDS	36830	36985	-111.749	-	0	ID=WPVWUZSG_CDS_0074;phrog=No_PHROG;top_hit=No_PHROG;locus_tag=WPVWUZSG_CDS_0074;function=unknown function;product=hypothetical protein
BASUE7_1	PHANOTATE	CDS	36926	37066	-0.311207	+	0	ID=WPVWUZSG_CDS_0075;phrog=No_PHROG;top_hit=No_PHROG;locus_tag=WPVWUZSG_CDS_0075;function=unknown function;product=hypothetical protein
BASUE7_1	PHANOTATE	CDS	37194	38258	-3.55698e+07	+	0	ID=WPVWUZSG_CDS_0076;phrog=412;top_hit=p123465 VI_04287;locus_tag=WPVWUZSG_CDS_0076;function=DNA, RNA and nucleotide metabolism;product=exonuclease VIII
BASUE7_1	PHANOTATE	CDS	38333	38980	-51535.4	+	0	ID=WPVWUZSG_CDS_0077;phrog=2324;top_hit=KX815270_p34;locus_tag=WPVWUZSG_CDS_0077;function=DNA, RNA and nucleotide metabolism;product=Erf-like ssDNA annealing protein
BASUE7_1	PHANOTATE	CDS	39027	39443	-284.357	+	0	ID=WPVWUZSG_CDS_0078;phrog=44;top_hit=p256451 VI_01358;locus_tag=WPVWUZSG_CDS_0078;function=DNA, RNA and nucleotide metabolism;product=single strand DNA binding protein
BASUE7_1	PHANOTATE	CDS	39474	41321	-4.72446e+09	-	0	ID=WPVWUZSG_CDS_0079;phrog=1980;top_hit=NC_019419_p38;locus_tag=WPVWUZSG_CDS_0079;function=tail;product=tail fiber protein
BASUE7_1	PHANOTATE	CDS	41422	42342	-1.9342e+06	-	0	ID=WPVWUZSG_CDS_0080;phrog=510;top_hit=p276824 VI_04255;locus_tag=WPVWUZSG_CDS_0080;function=DNA, RNA and nucleotide metabolism;product=DNA primase
BASUE7_1	PHANOTATE	CDS	42419	42871	-114.324	-	0	ID=WPVWUZSG_CDS_0081;phrog=2856;top_hit=MG241338_p30;locus_tag=WPVWUZSG_CDS_0081;function=transcription regulation;product=transcriptional regulator
BASUE7_1	PHANOTATE	CDS	42965	44983	-3176731232430410	+	0	ID=WPVWUZSG_CDS_0082;phrog=34481;top_hit=NC_019725_p65;locus_tag=WPVWUZSG_CDS_0082;function=unknown function;product=hypothetical protein
BASUE7_1	PHANOTATE	CDS	44980	45396	-4680.5	+	0	ID=WPVWUZSG_CDS_0083;phrog=824;top_hit=NC_025471_p57;locus_tag=WPVWUZSG_CDS_0083;function=unknown function;product=hypothetical protein
BASUE7_1	PHANOTATE	CDS	45464	46177	-18914.7	+	0	ID=WPVWUZSG_CDS_0084;phrog=111;top_hit=p64666 VI_08735;locus_tag=WPVWUZSG_CDS_0084;function=other;product=DNA methyltransferase
BASUE7_1	PHANOTATE	CDS	46174	46425	-1055.49	+	0	ID=WPVWUZSG_CDS_0085;phrog=2676;top_hit=KY985004_p59;locus_tag=WPVWUZSG_CDS_0085;function=unknown function;product=hypothetical protein
BASUE7_1	PHANOTATE	CDS	46492	46701	-146.555	+	0	ID=WPVWUZSG_CDS_0086;phrog=2180;top_hit=KY398841_p53;locus_tag=WPVWUZSG_CDS_0086;function=unknown function;product=hypothetical protein
BASUE7_1	PHANOTATE	CDS	46782	47183	-5920.43	+	0	ID=WPVWUZSG_CDS_0087;phrog=38834;top_hit=KY985004_p62;locus_tag=WPVWUZSG_CDS_0087;function=unknown function;product=hypothetical protein
BASUE7_1	PHANOTATE	CDS	47262	48413	-1.75979e+07	+	0	ID=WPVWUZSG_CDS_0088;phrog=704;top_hit=MF001366_p25;locus_tag=WPVWUZSG_CDS_0088;function=DNA, RNA and nucleotide metabolism;product=DNA repair exonuclease
BASUE7_1	PHANOTATE	CDS	48476	48652	-17.8711	+	0	ID=WPVWUZSG_CDS_0089;phrog=4788;top_hit=KX828710_p64;locus_tag=WPVWUZSG_CDS_0089;function=unknown function;product=hypothetical protein
BASUE7_1	PHANOTATE	CDS	48771	48986	-8.36307	+	0	ID=WPVWUZSG_CDS_0090;phrog=2877;top_hit=MF158039_p9;locus_tag=WPVWUZSG_CDS_0090;function=lysis;product=holin
BASUE7_1	PHANOTATE	CDS	48986	49474	-2008.32	+	0	ID=WPVWUZSG_CDS_0091;phrog=7;top_hit=NC_001629_p14;locus_tag=WPVWUZSG_CDS_0091;function=lysis;product=endolysin
BASUE7_1	PHANOTATE	CDS	49474	49875	-219.121	+	0	ID=WPVWUZSG_CDS_0092;phrog=1804;top_hit=MF158039_p7;locus_tag=WPVWUZSG_CDS_0092;function=lysis;product=Rz-like spanin
BASUE7_1	PHANOTATE	CDS	49885	50085	-123.382	-	0	ID=WPVWUZSG_CDS_0093;phrog=9539;top_hit=NC_031050_p72;locus_tag=WPVWUZSG_CDS_0093;function=unknown function;product=hypothetical protein
BASUE7_1	PHANOTATE	CDS	50102	50239	-0.365937	+	0	ID=WPVWUZSG_CDS_0094;phrog=No_PHROG;top_hit=No_PHROG;locus_tag=WPVWUZSG_CDS_0094;function=unknown function;product=hypothetical protein

## Sheet: BASUE9
BASUE10_1	PHANOTATE	CDS	3	899	-13825.1	+	0	ID=YMMDMEWB_CDS_0001;phrog=6921;top_hit=KM979355_p107;locus_tag=YMMDMEWB_CDS_0001;function=tail;product=tail fiber protein
BASUE10_1	PHANOTATE	CDS	930	1346	-298.01	-	0	ID=YMMDMEWB_CDS_0002;phrog=44;top_hit=p256451 VI_01358;locus_tag=YMMDMEWB_CDS_0002;function=DNA, RNA and nucleotide metabolism;product=single strand DNA binding protein
BASUE10_1	PHANOTATE	CDS	1393	2040	-50441.5	-	0	ID=YMMDMEWB_CDS_0003;phrog=2324;top_hit=KX815270_p34;locus_tag=YMMDMEWB_CDS_0003;function=DNA, RNA and nucleotide metabolism;product=Erf-like ssDNA annealing protein
BASUE10_1	PHANOTATE	CDS	2115	3179	-2.89167e+07	-	0	ID=YMMDMEWB_CDS_0004;phrog=412;top_hit=p123465 VI_04287;locus_tag=YMMDMEWB_CDS_0004;function=DNA, RNA and nucleotide metabolism;product=exonuclease VIII
BASUE10_1	PHANOTATE	CDS	3307	3447	-0.3589	-	0	ID=YMMDMEWB_CDS_0005;phrog=No_PHROG;top_hit=No_PHROG;locus_tag=YMMDMEWB_CDS_0005;function=unknown function;product=hypothetical protein
BASUE10_1	PHANOTATE	CDS	3388	3543	-101.821	+	0	ID=YMMDMEWB_CDS_0006;phrog=No_PHROG;top_hit=No_PHROG;locus_tag=YMMDMEWB_CDS_0006;function=unknown function;product=hypothetical protein
BASUE10_1	PHANOTATE	CDS	3706	3936	-63.2587	+	0	ID=YMMDMEWB_CDS_0007;phrog=4281;top_hit=NC_019724_p24;locus_tag=YMMDMEWB_CDS_0007;function=unknown function;product=hypothetical protein
BASUE10_1	PHANOTATE	CDS	3939	4895	-5534.34	+	0	ID=YMMDMEWB_CDS_0008;phrog=1265;top_hit=p281072 VI_11962;locus_tag=YMMDMEWB_CDS_0008;function=moron, auxiliary metabolic gene and host takeover;product=membrane protein
BASUE10_1	PHANOTATE	CDS	4923	8372	-1.0581e+22	-	0	ID=YMMDMEWB_CDS_0009;phrog=2589;top_hit=p216626 VI_11255;locus_tag=YMMDMEWB_CDS_0009;function=tail;product=tail protein
BASUE10_1	PHANOTATE	CDS	8450	9049	-783.048	-	0	ID=YMMDMEWB_CDS_0010;phrog=4946;top_hit=p86380 VI_02810;locus_tag=YMMDMEWB_CDS_0010;function=tail;product=tail protein
BASUE10_1	PHANOTATE	CDS	9046	9780	-2.19679e+06	-	0	ID=YMMDMEWB_CDS_0011;phrog=30;top_hit=p413732 VI_07955;locus_tag=YMMDMEWB_CDS_0011;function=tail;product=minor tail protein
BASUE10_1	PHANOTATE	CDS	9777	10559	-42948.7	-	0	ID=YMMDMEWB_CDS_0012;phrog=18;top_hit=p22999 VI_12315;locus_tag=YMMDMEWB_CDS_0012;function=tail;product=minor tail protein
BASUE10_1	PHANOTATE	CDS	10639	10992	-122.612	-	0	ID=YMMDMEWB_CDS_0013;phrog=14;top_hit=NC_019721_p14;locus_tag=YMMDMEWB_CDS_0013;function=tail;product=minor tail protein
BASUE10_1	PHANOTATE	CDS	10995	13868	-1.39261e+19	-	0	ID=YMMDMEWB_CDS_0014;phrog=24;top_hit=p178470 VI_05726;locus_tag=YMMDMEWB_CDS_0014;function=tail;product=tail length tape measure protein
BASUE10_1	PHANOTATE	CDS	13908	14105	-33.2406	-	0	ID=YMMDMEWB_CDS_0015;phrog=17368;top_hit=NC_027350_p15;locus_tag=YMMDMEWB_CDS_0015;function=tail;product=tail length tape measure protein
BASUE10_1	PHANOTATE	CDS	14143	14250	-0.0856861	-	0	ID=YMMDMEWB_CDS_0016;phrog=No_PHROG;top_hit=No_PHROG;locus_tag=YMMDMEWB_CDS_0016;function=unknown function;product=hypothetical protein
BASUE10_1	PHANOTATE	CDS	14225	14542	-718.69	-	0	ID=YMMDMEWB_CDS_0017;phrog=17368;top_hit=NC_027350_p15;locus_tag=YMMDMEWB_CDS_0017;function=tail;product=tail length tape measure protein
BASUE10_1	PHANOTATE	CDS	14657	15325	-8113.01	-	0	ID=YMMDMEWB_CDS_0018;phrog=584;top_hit=NC_027383_p27;locus_tag=YMMDMEWB_CDS_0018;function=tail;product=major tail protein
BASUE10_1	PHANOTATE	CDS	15327	15725	-1967.22	-	0	ID=YMMDMEWB_CDS_0019;phrog=179;top_hit=NC_026610_p50;locus_tag=YMMDMEWB_CDS_0019;function=connector;product=tail terminator
BASUE10_1	PHANOTATE	CDS	15715	16158	-150.571	-	0	ID=YMMDMEWB_CDS_0020;phrog=169;top_hit=NC_018454_p37;locus_tag=YMMDMEWB_CDS_0020;function=connector;product=tail completion or Neck1 protein
BASUE10_1	PHANOTATE	CDS	16151	16522	-402.32	-	0	ID=YMMDMEWB_CDS_0021;phrog=161;top_hit=NC_029019_p15;locus_tag=YMMDMEWB_CDS_0021;function=connector;product=head closure Hc1
BASUE10_1	PHANOTATE	CDS	16519	16932	-639.592	-	0	ID=YMMDMEWB_CDS_0022;phrog=302;top_hit=p289237 VI_09357;locus_tag=YMMDMEWB_CDS_0022;function=head and packaging;product=virion structural protein
BASUE10_1	PHANOTATE	CDS	16975	17265	-497.045	-	0	ID=YMMDMEWB_CDS_0023;phrog=2716;top_hit=NC_028786_p13;locus_tag=YMMDMEWB_CDS_0023;function=unknown function;product=hypothetical protein
BASUE10_1	PHANOTATE	CDS	17315	18274	-1.60366e+06	-	0	ID=YMMDMEWB_CDS_0024;phrog=264;top_hit=p358640 VI_12386;locus_tag=YMMDMEWB_CDS_0024;function=head and packaging;product=major head protein
BASUE10_1	PHANOTATE	CDS	18366	19133	-3769.39	-	0	ID=YMMDMEWB_CDS_0025;phrog=1989;top_hit=NC_024784_p7;locus_tag=YMMDMEWB_CDS_0025;function=unknown function;product=hypothetical protein
BASUE10_1	PHANOTATE	CDS	19196	19672	-142.804	-	0	ID=YMMDMEWB_CDS_0026;phrog=1989;top_hit=NC_024784_p7;locus_tag=YMMDMEWB_CDS_0026;function=unknown function;product=hypothetical protein
BASUE10_1	PHANOTATE	CDS	19684	20796	-2.28457e+08	-	0	ID=YMMDMEWB_CDS_0027;phrog=530;top_hit=p70477 VI_02625;locus_tag=YMMDMEWB_CDS_0027;function=head and packaging;product=head maturation protease
BASUE10_1	PHANOTATE	CDS	20799	21560	-2674.52	-	0	ID=YMMDMEWB_CDS_0028;phrog=324;top_hit=p327935 VI_06679;locus_tag=YMMDMEWB_CDS_0028;function=head and packaging;product=head morphogenesis
BASUE10_1	PHANOTATE	CDS	21550	22884	-2.87144e+10	-	0	ID=YMMDMEWB_CDS_0029;phrog=12751;top_hit=p305174 VI_10042;locus_tag=YMMDMEWB_CDS_0029;function=unknown function;product=hypothetical protein
BASUE10_1	PHANOTATE	CDS	22888	24456	-5.40046e+11	-	0	ID=YMMDMEWB_CDS_0030;phrog=38;top_hit=p428778 VI_10880;locus_tag=YMMDMEWB_CDS_0030;function=head and packaging;product=terminase large subunit
BASUE10_1	PHANOTATE	CDS	24496	25020	-16738.1	-	0	ID=YMMDMEWB_CDS_0031;phrog=606;top_hit=NC_011318_p1;locus_tag=YMMDMEWB_CDS_0031;function=head and packaging;product=terminase small subunit
BASUE10_1	PHANOTATE	CDS	25013	25108	-0.512082	-	0	ID=YMMDMEWB_CDS_0032;phrog=No_PHROG;top_hit=No_PHROG;locus_tag=YMMDMEWB_CDS_0032;function=unknown function;product=hypothetical protein
BASUE10_1	PHANOTATE	CDS	25105	25332	-29.708	-	0	ID=YMMDMEWB_CDS_0033;phrog=5976;top_hit=MF093736_p42;locus_tag=YMMDMEWB_CDS_0033;function=unknown function;product=hypothetical protein
BASUE10_1	PHANOTATE	CDS	25334	25519	-10.0625	-	0	ID=YMMDMEWB_CDS_0034;phrog=2919;top_hit=KT825490_p70;locus_tag=YMMDMEWB_CDS_0034;function=unknown function;product=hypothetical protein
BASUE10_1	PHANOTATE	CDS	25500	25661	-45.5324	-	0	ID=YMMDMEWB_CDS_0035;phrog=6666;top_hit=MF093736_p44;locus_tag=YMMDMEWB_CDS_0035;function=unknown function;product=hypothetical protein
BASUE10_1	PHANOTATE	CDS	25621	25716	-0.164841	-	0	ID=YMMDMEWB_CDS_0036;phrog=No_PHROG;top_hit=No_PHROG;locus_tag=YMMDMEWB_CDS_0036;function=unknown function;product=hypothetical protein
BASUE10_1	PHANOTATE	CDS	25826	26029	-21.4238	-	0	ID=YMMDMEWB_CDS_0037;phrog=4927;top_hit=NC_031050_p24;locus_tag=YMMDMEWB_CDS_0037;function=unknown function;product=hypothetical protein
BASUE10_1	PHANOTATE	CDS	26029	26259	-349.818	-	0	ID=YMMDMEWB_CDS_0038;phrog=303;top_hit=p344653 VI_03289;locus_tag=YMMDMEWB_CDS_0038;function=unknown function;product=hypothetical protein
BASUE10_1	PHANOTATE	CDS	26259	26603	-1744.55	-	0	ID=YMMDMEWB_CDS_0039;phrog=9709;top_hit=MG049919_p48;locus_tag=YMMDMEWB_CDS_0039;function=unknown function;product=hypothetical protein
BASUE10_1	PHANOTATE	CDS	26600	26809	-85.859	-	0	ID=YMMDMEWB_CDS_0040;phrog=10456;top_hit=MG049919_p49;locus_tag=YMMDMEWB_CDS_0040;function=unknown function;product=hypothetical protein
BASUE10_1	PHANOTATE	CDS	26882	27454	-23413.5	-	0	ID=YMMDMEWB_CDS_0041;phrog=139;top_hit=KX507046_p83;locus_tag=YMMDMEWB_CDS_0041;function=other;product=deoxynucleoside monophosphate kinase
BASUE10_1	PHANOTATE	CDS	27456	27566	-6.802	-	0	ID=YMMDMEWB_CDS_0042;phrog=No_PHROG;top_hit=No_PHROG;locus_tag=YMMDMEWB_CDS_0042;function=unknown function;product=hypothetical protein
BASUE10_1	PHANOTATE	CDS	27563	28096	-33431	-	0	ID=YMMDMEWB_CDS_0043;phrog=415;top_hit=NC_014635_p66;locus_tag=YMMDMEWB_CDS_0043;function=other;product=polynucleotide kinase
BASUE10_1	PHANOTATE	CDS	28180	28626	-8951.74	-	0	ID=YMMDMEWB_CDS_0044;phrog=10642;top_hit=KX828710_p17;locus_tag=YMMDMEWB_CDS_0044;function=unknown function;product=hypothetical protein
BASUE10_1	PHANOTATE	CDS	28684	28851	-16.8375	-	0	ID=YMMDMEWB_CDS_0045;phrog=11330;top_hit=KX828710_p16;locus_tag=YMMDMEWB_CDS_0045;function=unknown function;product=hypothetical protein
BASUE10_1	PHANOTATE	CDS	28887	28997	-10.674	-	0	ID=YMMDMEWB_CDS_0046;phrog=No_PHROG;top_hit=No_PHROG;locus_tag=YMMDMEWB_CDS_0046;function=unknown function;product=hypothetical protein
BASUE10_1	PHANOTATE	CDS	29051	29689	-30986.1	-	0	ID=YMMDMEWB_CDS_0047;phrog=10580;top_hit=KX828710_p15;locus_tag=YMMDMEWB_CDS_0047;function=unknown function;product=hypothetical protein
BASUE10_1	PHANOTATE	CDS	29686	29973	-187.922	-	0	ID=YMMDMEWB_CDS_0048;phrog=986;top_hit=KX828710_p14;locus_tag=YMMDMEWB_CDS_0048;function=DNA, RNA and nucleotide metabolism;product=RNA-binding protein
BASUE10_1	PHANOTATE	CDS	29951	30217	-52.7456	-	0	ID=YMMDMEWB_CDS_0049;phrog=18601;top_hit=KX828710_p13;locus_tag=YMMDMEWB_CDS_0049;function=unknown function;product=hypothetical protein
BASUE10_1	PHANOTATE	CDS	30332	30481	-56.7714	-	0	ID=YMMDMEWB_CDS_0050;phrog=5579;top_hit=KU194205_p9;locus_tag=YMMDMEWB_CDS_0050;function=unknown function;product=hypothetical protein
BASUE10_1	PHANOTATE	CDS	30481	30987	-26168.8	-	0	ID=YMMDMEWB_CDS_0051;phrog=7116;top_hit=NC_009540_p6;locus_tag=YMMDMEWB_CDS_0051;function=unknown function;product=hypothetical protein
BASUE10_1	PHANOTATE	CDS	31058	31552	-5756.46	-	0	ID=YMMDMEWB_CDS_0052;phrog=9595;top_hit=KU194205_p7;locus_tag=YMMDMEWB_CDS_0052;function=unknown function;product=hypothetical protein
BASUE10_1	PHANOTATE	CDS	31624	31863	-380.303	-	0	ID=YMMDMEWB_CDS_0053;phrog=35072;top_hit=NC_019725_p10;locus_tag=YMMDMEWB_CDS_0053;function=unknown function;product=hypothetical protein
BASUE10_1	PHANOTATE	CDS	31866	32441	-12142.1	-	0	ID=YMMDMEWB_CDS_0054;phrog=No_PHROG;top_hit=No_PHROG;locus_tag=YMMDMEWB_CDS_0054;function=unknown function;product=hypothetical protein
BASUE10_1	PHANOTATE	CDS	32596	32802	-6.4774	-	0	ID=YMMDMEWB_CDS_0055;phrog=No_PHROG;top_hit=No_PHROG;locus_tag=YMMDMEWB_CDS_0055;function=unknown function;product=hypothetical protein
BASUE10_1	PHANOTATE	CDS	32865	32987	-3.15342	-	0	ID=YMMDMEWB_CDS_0056;phrog=No_PHROG;top_hit=No_PHROG;locus_tag=YMMDMEWB_CDS_0056;function=unknown function;product=hypothetical protein
BASUE10_1	PHANOTATE	CDS	33041	33136	-1.82058	+	0	ID=YMMDMEWB_CDS_0057;phrog=No_PHROG;top_hit=No_PHROG;locus_tag=YMMDMEWB_CDS_0057;function=unknown function;product=hypothetical protein
BASUE10_1	PHANOTATE	CDS	33222	33749	-693.838	+	0	ID=YMMDMEWB_CDS_0058;phrog=4578;top_hit=p180900 VI_03586;locus_tag=YMMDMEWB_CDS_0058;function=DNA, RNA and nucleotide metabolism;product=HNH endonuclease
BASUE10_1	PHANOTATE	CDS	33823	34008	-109.114	+	0	ID=YMMDMEWB_CDS_0059;phrog=7717;top_hit=NC_025425_p119;locus_tag=YMMDMEWB_CDS_0059;function=unknown function;product=hypothetical protein
BASUE10_1	PHANOTATE	CDS	34024	34209	-127.481	+	0	ID=YMMDMEWB_CDS_0060;phrog=3623;top_hit=NC_012749_p20;locus_tag=YMMDMEWB_CDS_0060;function=unknown function;product=hypothetical protein
BASUE10_1	PHANOTATE	CDS	34285	34656	-1308.26	+	0	ID=YMMDMEWB_CDS_0061;phrog=11577;top_hit=KU194206_p74;locus_tag=YMMDMEWB_CDS_0061;function=unknown function;product=hypothetical protein
BASUE10_1	PHANOTATE	CDS	34649	34849	-50.6192	+	0	ID=YMMDMEWB_CDS_0062;phrog=6503;top_hit=NC_031026_p67;locus_tag=YMMDMEWB_CDS_0062;function=unknown function;product=hypothetical protein
BASUE10_1	PHANOTATE	CDS	34867	35187	-207.03	+	0	ID=YMMDMEWB_CDS_0063;phrog=10555;top_hit=KX828710_p75;locus_tag=YMMDMEWB_CDS_0063;function=unknown function;product=hypothetical protein
BASUE10_1	PHANOTATE	CDS	35184	35327	-31.5327	+	0	ID=YMMDMEWB_CDS_0064;phrog=3955;top_hit=MG004687_p59;locus_tag=YMMDMEWB_CDS_0064;function=unknown function;product=hypothetical protein
BASUE10_1	PHANOTATE	CDS	35405	35629	-7.69318	+	0	ID=YMMDMEWB_CDS_0065;phrog=4344;top_hit=NC_026010_p81;locus_tag=YMMDMEWB_CDS_0065;function=unknown function;product=hypothetical protein
BASUE10_1	PHANOTATE	CDS	35633	35842	-89.1769	+	0	ID=YMMDMEWB_CDS_0066;phrog=9085;top_hit=NC_026010_p82;locus_tag=YMMDMEWB_CDS_0066;function=unknown function;product=hypothetical protein
BASUE10_1	PHANOTATE	CDS	35923	36339	-3717.01	+	0	ID=YMMDMEWB_CDS_0067;phrog=2684;top_hit=NC_026010_p83;locus_tag=YMMDMEWB_CDS_0067;function=unknown function;product=hypothetical protein
BASUE10_1	PHANOTATE	CDS	36416	37984	-2.7283e+11	+	0	ID=YMMDMEWB_CDS_0068;phrog=2373;top_hit=NC_010495_p48;locus_tag=YMMDMEWB_CDS_0068;function=DNA, RNA and nucleotide metabolism;product=DNA helicase
BASUE10_1	PHANOTATE	CDS	37989	38396	-147.004	+	0	ID=YMMDMEWB_CDS_0069;phrog=2794;top_hit=NC_028774_p43;locus_tag=YMMDMEWB_CDS_0069;function=unknown function;product=hypothetical protein
BASUE10_1	PHANOTATE	CDS	38404	38508	-0.467396	+	0	ID=YMMDMEWB_CDS_0070;phrog=9539;top_hit=NC_031050_p72;locus_tag=YMMDMEWB_CDS_0070;function=unknown function;product=hypothetical protein
BASUE10_1	PHANOTATE	CDS	38518	38922	-191.374	-	0	ID=YMMDMEWB_CDS_0071;phrog=1804;top_hit=MF158039_p7;locus_tag=YMMDMEWB_CDS_0071;function=lysis;product=Rz-like spanin
BASUE10_1	PHANOTATE	CDS	38919	39407	-2029.56	-	0	ID=YMMDMEWB_CDS_0072;phrog=7;top_hit=NC_001629_p14;locus_tag=YMMDMEWB_CDS_0072;function=lysis;product=endolysin
BASUE10_1	PHANOTATE	CDS	39407	39622	-9.6358	-	0	ID=YMMDMEWB_CDS_0073;phrog=2877;top_hit=MF158039_p9;locus_tag=YMMDMEWB_CDS_0073;function=lysis;product=holin
BASUE10_1	PHANOTATE	CDS	39741	39917	-29.8462	-	0	ID=YMMDMEWB_CDS_0074;phrog=4788;top_hit=KX828710_p64;locus_tag=YMMDMEWB_CDS_0074;function=unknown function;product=hypothetical protein
BASUE10_1	PHANOTATE	CDS	39980	41131	-3.88797e+07	-	0	ID=YMMDMEWB_CDS_0075;phrog=704;top_hit=MF001366_p25;locus_tag=YMMDMEWB_CDS_0075;function=DNA, RNA and nucleotide metabolism;product=DNA repair exonuclease
BASUE10_1	PHANOTATE	CDS	41210	41611	-2918.52	-	0	ID=YMMDMEWB_CDS_0076;phrog=38834;top_hit=KY985004_p62;locus_tag=YMMDMEWB_CDS_0076;function=unknown function;product=hypothetical protein
BASUE10_1	PHANOTATE	CDS	41692	41901	-149.993	-	0	ID=YMMDMEWB_CDS_0077;phrog=2180;top_hit=KY398841_p53;locus_tag=YMMDMEWB_CDS_0077;function=unknown function;product=hypothetical protein
BASUE10_1	PHANOTATE	CDS	41968	42219	-861.553	-	0	ID=YMMDMEWB_CDS_0078;phrog=2676;top_hit=KY985004_p59;locus_tag=YMMDMEWB_CDS_0078;function=unknown function;product=hypothetical protein
BASUE10_1	PHANOTATE	CDS	42216	42929	-16120.7	-	0	ID=YMMDMEWB_CDS_0079;phrog=111;top_hit=p64666 VI_08735;locus_tag=YMMDMEWB_CDS_0079;function=other;product=DNA methyltransferase
BASUE10_1	PHANOTATE	CDS	42997	43413	-2915.83	-	0	ID=YMMDMEWB_CDS_0080;phrog=824;top_hit=NC_025471_p57;locus_tag=YMMDMEWB_CDS_0080;function=unknown function;product=hypothetical protein
BASUE10_1	PHANOTATE	CDS	43410	45422	-1.12107e+16	-	0	ID=YMMDMEWB_CDS_0081;phrog=34481;top_hit=NC_019725_p65;locus_tag=YMMDMEWB_CDS_0081;function=unknown function;product=hypothetical protein
BASUE10_1	PHANOTATE	CDS	45522	45974	-134.464	+	0	ID=YMMDMEWB_CDS_0082;phrog=2856;top_hit=MG241338_p30;locus_tag=YMMDMEWB_CDS_0082;function=transcription regulation;product=transcriptional regulator
BASUE10_1	PHANOTATE	CDS	46051	46971	-996280	+	0	ID=YMMDMEWB_CDS_0083;phrog=510;top_hit=p276824 VI_04255;locus_tag=YMMDMEWB_CDS_0083;function=DNA, RNA and nucleotide metabolism;product=DNA primase
BASUE10_1	PHANOTATE	CDS	47072	48145	-455426	+	0	ID=YMMDMEWB_CDS_0084;phrog=1980;top_hit=NC_019419_p38;locus_tag=YMMDMEWB_CDS_0084;function=tail;product=tail fiber protein
