# Supplementary material for: Diverse lytic bacteriophages from India reveal genomic signatures and therapeutic potential against MDR Escherichia coli
Source: Research Square preprint supplement (doi:10.21203/rs.3.rs-6564877/v1), 2025-05-14
Supplement: Supplementary file 3 [file db539d41e2190daf74f62b70.xlsx]

## Sheet: BASUE2
Strand	Positions	Promoter Sequence	Type	Scores
+	(1215..1240)	TTGATTTCCATCCCAATTGTTAGACT	host	0.668
+	(2890..2915)	TTGCCATCTGGCTTATTTACGATAAT	host	0.763
+	(4191..4219)	GTTTACAGTTACCTCGCTTGAGCTATCTT	host	0.882
+	(5139..5164)	TTGATTACTTTTACATCATTCATAAT	host	0.652
+	(8519..8549)	TTGAGATGTACTCATCACCCTTCGCTAGAAT	host	0.519
+	(10611..10641)	TTGAAGTCTGGAAGTTGACCAAGAATAAAAT	host	0.619
+	(18645..18673)	TTGCCACAATAGCAGCCCCACCGTATAGT	host	0.875
+	(18973..19001)	TTGACAGCCTTGATTATATCTCATTTATT	host	0.542
+	(23523..23551)	TTGCCTGCTCCAGGAGCGCCGTTTAAAAT	host	0.794
+	(25566..25593)	TTGATTGCTTCGATTACGTCGTTAAATT	host	0.508
+	(28477..28504)	TTGATTTCAATCGCCTTTCGAATATAGT	host	0.76
+	(28788..28823)	CTATTACGCCGATTACATACCAATATATAATATAAT	host	0.973
+	(28821..28828)	AATAAATA	host	0.919
+	(30617..30644)	TTGATAATGATACTGGAGAGACAATAAT	host	0.655
+	(31295..31322)	AATGATTTATATTCACACTTTCTATACT	host	0.92
+	(31863..31891)	TGGATATGGACGCAGAAAGCGAATATAAT	host	0.506
+	(41316..41345)	TTGACACTGCTTTGCAACCATAGCAAAAAT	host	0.699
+	(41554..41582)	TTGAATCGTTGTAACGTTTACGCTATAAT	host	0.98
+	(43112..43140)	TTGCAAGTCGGATAGCACAATGATAAAAT	host	0.902
+	(45170..45195)	TTGACTGAATACCAGCTTAGGAAAAT	host	0.578
+	(47501..47530)	TAGAAATACACAGATATCCATGAATAGAAT	host	0.526
+	(47536..47561)	TTGATTATATTTTGAACAAATATGAT	host	0.899
+	(47619..47644)	AATAATTATATATATAAAGCTAAAAT	host	0.659
+	(47644..47671)	TTAAATATTATCTATCTATATATATTAT	host	0.732
+	(47780..47808)	TTGCAATAAAAGTAAATGCGACATACAAT	host	0.798

## Sheet: BASUE7
Strand	Positions	Promoter Sequence	Type	Scores
+	(1707..1733)	TTGATATCGATCGGATCTTGCCAAAAT	host	0.815
+	(3049..3076)	TTGCCAGTATAGAAAGTGTGAATATAAA	host	0.739
+	(3098..3129)	TTGATACGCCGTCACCAGGTTGATGCTATGAT	host	0.895
+	(5506..5534)	TTGTCACGATTGTAATATTTGTCTAGAAT	host	0.744
+	(5574..5603)	TAGACATATGGATATATGTATATATATAAT	host	0.974
+	(5618..5645)	TTTATTTATATATATAGATAATTATATT	host	0.743
+	(5767..5792)	TAGACAAATGTTACACAGCTTAAAAT	host	0.584
+	(7430..7459)	TAAAACAGGATCGTGGTATCTTGCTATAGT	host	0.655
+	(9981..10009)	TGAATTAAAGAAGAAAGGGAATATATAAT	host	0.816
+	(11437..11468)	TTAAAAAATTATTTTTGCATCACTATTAAAAT	host	0.734
+	(13352..13377)	TTGACAACGACAGTCGTGATTATATT	host	0.989
+	(13502..13531)	TAAAACGTCGGTGGGGTGATTTGATATAGT	host	0.796
+	(14544..14573)	TTGACCTGAATCTCTGAGCGGTGATAGTAT	host	0.731
+	(15009..15016)	AATAAATA	host	0.971
+	(15056..15081)	TTGATTATCGCTGGTGTCATTATTTT	host	0.522
+	(15267..15274)	GATAAATA	host	0.711
+	(20550..20577)	TTGATGTTGCTAAAGATTCTGATATCAT	host	0.722
+	(22020..22047)	TTGACGCTTTAACAAAAAGTGCTATTAT	host	0.978
+	(22022..22047)	GACGCTTTAACAAAAAGTGCTATTAT	host	0.692
+	(22331..22358)	TTGATAAGGTTGGCACGGCTCAGATTAT	host	0.532
+	(26356..26384)	TTGCCTATGTTGTTCAAAATCTATAAAAT	host	0.879
+	(30008..30037)	TGGAACGCTGCCGCCGAAAGAAATTACATT	host	0.614
+	(31974..31981)	AATAAATA	host	0.909
+	(34323..34352)	TTGATTCCGTACCCGCAGCATGAGTATTAT	host	0.969
+	(34346..34381)	GTATTATCACTCACCGATGCCGGGTGGGAATATTGT	host	0.619
+	(36857..36882)	TTTAATTTTAGCTTTATATATATAAT	host	0.864
+	(36922..36948)	TTGATTGATTCGTCAAATTTCTATCAT	host	0.866
+	(37135..37162)	TTGACTAAACGCTGTTAATGGCTATAAT	host	0.996
+	(37635..37642)	GATAAATA	host	0.517
+	(38269..38301)	TAGCTAAACAAATAATTAATGAGGTGTTATAAT	host	0.906
+	(40355..40362)	TATAAATA	host	0.565
+	(41821..41847)	TTGACATGGTATGGTGTGAAATACGCT	host	0.597
+	(43257..43289)	TTGACAACTTCGGGGTAACTAACTCCATATTCT	host	0.682
+	(45077..45106)	TGAAATACAACTTCCCACACCTTCTATTTT	host	0.716
+	(46319..46345)	TTGATATGTCTTTCGATGAGATAAAAA	host	0.509
+	(48708..48736)	TTGTATCAAATAAATTTGAAGGTTAAAAT	host	0.858
+	(49218..49243)	TTGACAAAAAGGTGAATGTTGATATT	host	0.697
+	(9168..9190)	AAAGAAAACTCACCAAATAAGGA	phage	0.593
+	(23703..23725)	AATTTAGCCAGACTTTCGGAGAG	phage	0.517
+	(27700..27722)	CATTAAGCCGGACGAAAGGAGAA	phage	0.606

## Sheet: BASUE10
Strand	Positions	Promoter Sequence	Type	Scores
+	(1038..1063)	TTGACTGAATACCAGCTTAGGAAAAT	host	0.565
+	(3369..3398)	TAGAAATACACAGATATCCATGAATAGAAT	host	0.6
+	(3404..3429)	TTGATTATATTTTGAACAAATATGAT	host	0.895
+	(3487..3512)	AATAATTATATATATAAAGCTAAAAT	host	0.69
+	(3512..3539)	TTAAATATTATCTATCTATATATATTAT	host	0.568
+	(3648..3676)	TTGCAATAAAAGTAAATGCGACATACAAT	host	0.83
+	(5103..5128)	TTGATTTCCATCCCAATTGTTAGACT	host	0.754
+	(6778..6803)	TTGCCATCTGGCTTATTTACGATAAT	host	0.758
+	(8079..8107)	GTTTACAGTTACCTCGCTTGAGCTATCTT	host	0.875
+	(9027..9052)	TTGATTACTTTTACATCATTCATAAT	host	0.69
+	(12407..12437)	TTGAGATGTACTCATCACCCTTCGCTAGAAT	host	0.637
+	(14499..14529)	TTGAAGTCTGGAAGTTGACCAAGAATAAAAT	host	0.591
+	(22533..22561)	TTGCCACAATAGCAGCCCCACCGTATAGT	host	0.873
+	(22861..22889)	TTGACAGCCTTGATTATATCTCATTTATT	host	0.515
+	(27411..27439)	TTGCCTGCTCCAGGAGCGCCGTTTAAAAT	host	0.793
+	(28062..28089)	TTGATAGTTTGACCCCAAATTGTAATTT	host	0.525
+	(29454..29481)	TTGATTGCTTCGATTACGTCGTTAAATT	host	0.608
+	(31167..31197)	TTGCCAACGTAAGCTAGGGTGCTGGTAATTT	host	0.556
+	(32116..32143)	TTGATTCGCACAGATACGGCCTTATTGT	host	0.51
+	(32365..32392)	TTGATTTCAATCGCCTTTCGAATATAGT	host	0.759
+	(32676..32711)	CTATTACGCCGATTACATACCAATATATAATATAAT	host	0.966
+	(32709..32716)	AATAAATA	host	0.919
+	(34505..34532)	TTGATAATGATACTGGAGAGACAATAAT	host	0.725
+	(35183..35210)	AATGATTTATATTCACACTTTCTATACT	host	0.922
+	(35808..35833)	TTGATGAGGACGACGACGATTATATT	host	0.509
+	(35827..35862)	TTATATTCCCTGGTAAATAGCACGATTTGTTAATAT	host	0.569
+	(45204..45233)	TTGACACTGCTTTGCAACCATAGCAAAAAT	host	0.615
+	(45442..45470)	TTGAATCGTTGTAACGTTTACGCTATAAT	host	0.98
+	(47000..47028)	TTGCAAGTCGGATAGCACAATGATAAAAT	host	0.861
+	(47113..47141)	TGGAACGGTTCGCGGAACCGACACAAAAT	host	0.519
