# Supplementary material for: Diverse lytic bacteriophages from India reveal genomic signatures and therapeutic potential against MDR Escherichia coli
Source: Research Square preprint supplement (doi:10.21203/rs.3.rs-6564877/v1), 2025-05-14
Supplement: Supplementary file 4 [file fb6b0b59eae6fb67b0898acb.xlsx]

## Sheet: BASUE2
>BASUE2
1001 Both - GGTAACAGAAAGGGGCCGATTGGCCCCTTTTTTTAATAC -13.50
1002 Both + TATTAAAAAAAGGGGCCAATCGGCCCCTTTCTGTTACCA -13.50
1379 Both - TGGTTCCGGAGCTGCGGCTAAGGCGCAGaTTTTGTTTGAGG -7.50
4529 Both - GTTAAAATCAACCCGCCTTGCGCGGGTTTTTTTTCGCC -8.90
4530 Rnamotif + GCGAAAAAAAACCCGCGCAAGGCGGGTTGATTTTAACT -10.20
5809 Both + TTGGGTAACTACCCCGCAGCATTCTCGGGGgTATTCTTCTTGA -8.00
6708 Both - CATGACAAAAGCCCGCCTTGCGCGGGTTTTTTTGTAGC -8.90
6709 Both + CTACAAAAAAACCCGCGCAAGGCGGGcTTTTGTCATGAA -10.20
9993 Both - GAATAACTAAGCCGCCGTTTGGCGGTTTTTTTGTATA -9.40
9994 Both + ATACAAAAAAACCGCCAAACGGCGGcTTAGTTATTCTG -9.40
10727 Both - CATATCTACAAGGGGGCTTGCGCCCCCTTATTCATTTCTG NA
11020 Both + TTAGCGAGATCGCAGATTTAAACGTTGGGATCTGCTGTTCTTTATCG -9.40
13050 Erpin - TATTAATCAACAAGGCGCTTAATGCGCCTTTTTTTATAGGTGG NA
13052 Both + ACCTATAAAAAAAGGCGCATTAAGCGCCTTgTTGATTAATAGTA NA
13053 Both - TTAATCAACAAGGCGCTTAATGCGCCTTTTTTTATAGG -9.90
13387 Both - GTAATATTATAGGGACTAACTTAGTTGGTCCCTTTTTTATTGGA -10.60
13545 Both + GCTTCCGGGATTTCGATGGACATATTCATCGGATTTTTTTCGTAC -7.70
14402 Both - CTATTATTGAAGCCGTGAACATAATCACGGCTTTTTTATTAAC -11.70
14403 Erpin + TTAATAAAAAAGCCGTGATTATGTTCACGGCTTCAATAATAGCA NA
15253 Both - GTTTAATATGGGGACTATCCTTTTTTTGGATAGTCCtTTTTTTATGGAGA -10.40
15812 Rnamotif + AAACGTGAATTTGGCGTAACAGGCGCGGCGTCGTTTTTCTCTTCC -4.50
16774 Both + CTCAACTCGATCGCCGTGCGGCGTTTTGTAAACCT -5.70
18952 Both - GATATAATCAAGGCTGTCAATTGACGGCCTTTTTTATTGGA -11.70
20668 Both + TACTGTCGATGCGGAAGCTGACGAGTTTTCGaTATTGATTGAGG -8.50
21181 Both - ATAAATACTAACCCGCTTCGGCGGGTTTTTTTATGCC -9.80
21182 Rnamotif + GCATAAAAAAACCCGCCGAAGCGGGTTAGTATTTATC -8.90
21641 Both - CCTGGAGAGGCCGTTATTGGTCGCATCGATGGCGTTATGATTAAGG -6.70
25117 Both - GTAATTTTAACGGGGAATCGACTCTGAGCGGTTCCCCTTTCTTTTGGAGA -12.50
32082 Both - CGAAACGCTCTCGACCTTTGTATAGGTTGTTAATTTCAAAT -6.50
34613 Both - GACGAAAAAAAGGAGGCTTAGCCTCCTTTGTTATTTGT -10.10
34614 Both + CAAATAACAAAGGAGGCTAAGCCTCCTTTTTTTCGTCC -10.10
35794 Rnamotif - ATCACCTTACAGGCTGGCATGATTTACATGCTGGCCTTTTTGCGTTGT -10.80
36051 Rnamotif + TGTGGTTACTATGCCCGAATCCCTTCGGGCGTTTTTATCAATT -11.90
38039 Both + TGAAATAACTATACCCGACTTTCGCCGGGTATTTTTAGCAATT -8.60
40820 Rnamotif - GGATCTGAATTTAGGGGCGTAGTTCCTATTCTTGTTGAGA -6.10
41757 Both - GAGCATCAAGTCGCGCTCGCAGTCCGGCGCGTGTTTCTTCTTT -9.00
42081 Erpin - CAAAATAAAAAACGCGTATAAGGATGTTAACCCGCTACGCGTcGTTTGTTTTAACT NA
42083 Both + TTAAAACAAACGACGCGTAGCGGGTTAACATCCTTATACGCGTTTTTTATTTTGGAG -9.40
43073 Rnamotif + ACCTACTCTGACCGCCTTCTGGCGGTTTTTTATTGTC -10.00
44026 Both - AGTAACTCTAATGGGGCGTCTGGCCTCAagTTTTTCCATGAT -9.40
45023 Both - TCTGATAAGAAAGCCCCGCATTGCGGGGCTtTTCTTTATGATTG -16.00
45027 Both + CATAAAGAAAAGCCCCGCAATGCGGGGCTTTCTTATCAGA -14.70
46185 Rnamotif + TGATTGGTGTATGAGGTGCATTATAACACCTCATTAATTATTTGT -9.90
Total number of predicted transcription terminators: 43

## Sheet: BASUE7
>BASUE7_1
2014 Rnamotif - CGGTCGCGCTCTCGGCGGCGTAGCTGGTTATATTTTTGA -5.60
6686 Both - AGAAGATAATACCCGATCCGCTCGGTCGGGTTTTAACAAAAA -10.80
6687 Both + TTTTGTTAAAACCCGACCGAGCGGATCGGGTATTATCTTCTC -6.20
11117 Both + GTAATGTTAACGGGGAATCGGCTCTGAACGGTTCCCCTTTCTTTTGGAG -12.50
13833 Rnamotif - TCGATCTGGTTGAGCAACTCGGCAGTTGCTCcTTTTACGTGCAA -10.50
15267 Both - GCATAAAAAAACCCGCCGAAGCGGGTTAGTATTTATC -8.90
15268 Both + ATAAATACTAACCCGCTTCGGCGGGTTTTTTTATGCC -9.80
15774 Rnamotif - TACTGTCGATGCGGAAGCTGACGAGTTTTCGaTATTGATTGAGG -8.50
17493 Both + GATATAATCAAGGCTGTCAATTGACGGCCTTTTTTATTGGA -11.70
19677 Rnamotif - CTCAACTCGATCGCCGTGCGGCGTTTTGTAAACCT -5.70
20629 Rnamotif - AAACGTGAATTTGGCGTAACAGGCGCGGCGTCGTTTTTCTCTTCC -4.50
21183 Both + GTTTAATATGGGGACTATCCTTTTTTTGGATAGTCCTTTTTTTATGGA -10.40
22039 Both - TTAATAAAAAAGCCGTGATTATGTTCACGGCTTCAATAATAGCA NA
22041 Both + CTATTATTGAAGCCGTGAACATAATCACGGCTTTTTTATTAAC -11.70
22896 Rnamotif - GCTTCCGGGATCTCGATGGACATGTTCATCGGGTTCTTTTCGTAA -8.90
23055 Both + GTAATATTATAGGGGCTAACTTAGTTAGTCCCTTTTTTATTGGA -10.30
23391 Both + TATTAATCATCAAGGCGCTCATGTAGCGCCTTTTTTTATGGGGGT -12.00
24658 Rnamotif + AGTTATCAGCGGCGGCGCGAGCCGCTTTTCTATCAAA -10.20
26455 Both - ATACGAAAAAACCGCCAAACGGCGGcTTAGTTGTTTTG -9.40
26457 Both + AAACAACTAAGCCGCCGTTTGGCGGTTTTTTCGTATA -9.40
29738 Both - CTACAAAAAAACCCGCGCAAGGCGGGcTTTTGTCATGAA -10.20
29740 Both + CATGACAAAAGCCCGCCTTGCGCGGGTTTTTTTGTAGC -8.90
30634 Rnamotif - TTGGGTAACTACCCCGCAGCATTCGCGGGGgTATTCTTCTTGA -12.80
31918 Both - GCGAAAAAAAACCCGCGCAAGGCGGGTTAATTTTAACT -10.20
31919 Both + GTTAAAATTAACCCGCCTTGCGCGGGTTTTTTTTCGCC -8.90
35066 Both + TGGTTCCGGAGCTGCGGTTAAGGCGCAGaTTTTGTTTGAGG -7.50
35445 Both - TATTAAAAAAAGGGGCCAATCGGCCCCTTTCTGTTACCA -13.50
35446 Both + GGTAACAGAAAGGGGCCGATTGGCCCCTTTTTTTAATAC -13.50
38276 Both - TGATTGGTGTATGAGGTGCATTATAACACCTCATTAATTATTTGT -9.90
39439 Both - CATAAAGAAAAGCCCCGCATTGCGGGGCTTTCTTATCAGA -14.70
39439 Both + TCTGATAAGAAAGCCCCGCAATGCGGGGCTtTTCTTTATGATTG -16.00
40438 Rnamotif + AGTAACTCTAATGGGGCGTCTGGCCTCAagTTTTTCCATGAT -9.40
41396 Both - ACCTACTCTGACCGCCTTCTGGCGGTTTTTTATTGTC -10.00
42368 Erpin - AAAACAAACGACGCGTAGCGGGTTAACATCCTTCTACGCGTTTTTTATTTTGG NA
42369 Both + CAAAATAAAAAACGCGTAGAAGGATGTTAACCCGCTACGCGTcGTTTGTTTTAACT -10.60
42706 Rnamotif + GAGCATCAAGTCGCGCTCGCAGTCCGGCGCGTGTTTCTTCTTT -9.00
46423 Rnamotif - TGAAATAACTATACCCGACTTTCGCCGGGTAgTTTTAGCAATTA -8.80
46915 Rnamotif - TCGTTAATGTTTAAGCCTGGAAGGCTTGTTGTTCTTTGCT -7.00
47330 Rnamotif - GCGCTTCAACTGTGCGGATGTGCATACCGTACTTTTCCGCAATC -7.30
48412 Rnamotif - TGTGGTTACTATGCCCGAATCCCTTCGGGCGTTTTTATCAATT -11.90
48664 Both + ATCACCTTACAGGCTGGCATGATTTACATGCTGGCCTTTTTGCGTTGT -10.80
49854 Both - CAAATAACAAAGGAGGCTAAGCCTCCTTTTTTTCGTCC -10.10
49855 Both + GACGAAAAAAAGGAGGCTTAGCCTCCTTTGTTATTTGT -10.10
Total number of predicted transcription terminators: 43

## Sheet: BASUE10
>BASUE10_1
891 Both - TCTGATAAGAAAGCCCCGCATTGCGGGGCTtTTCTTTATGATTG -16.00
895 Both + CATAAAGAAAAGCCCCGCAATGCGGGGCTTTCTTATCAGA -14.70
2053 Both + TGATTGGTGTATGAGGTGCATTATAACACCTCATTAATTATTTGT -9.90
4889 Both - GGTAACAGAAAGGGGCCGATTGGCCCCTTTTTTTAATAC -13.50
4890 Both + TATTAAAAAAAGGGGCCAATCGGCCCCTTTCTGTTACCA -13.50
5267 Both - TGGTTCCGGAGCTGCGGCTAAGGCGCAGaTTTTGTTTGAGG -7.50
8417 Both - GTTAAAATCAACCCGCCTTGCGCGGGTTTTTTTTCGCC -8.90
8418 Rnamotif + GCGAAAAAAAACCCGCGCAAGGCGGGTTGATTTTAACT -10.20
9697 Both + TTGGGTAACTACCCCGCAGCATTCTCGGGGgTATTCTTCTTGA -8.00
10596 Both - CATGACAAAAGCCCGCCTTGCGCGGGTTTTTTTGTAGC -8.90
10597 Both + CTACAAAAAAACCCGCGCAAGGCGGGcTTTTGTCATGAA -10.20
13881 Both - GAATAACTAAGCCGCCGTTTGGCGGTTTTTTTGTATA -9.40
13882 Both + ATACAAAAAAACCGCCAAACGGCGGcTTAGTTATTCTG -9.40
14615 Both - CATATCTACAAGGGGGCTTGCGCCCCCTTATTCATTTCTG NA
14908 Both + TTAGCGAGATCGCAGATTTAAACGTTGGGATCTGCTGTTCTTTATCG -9.40
16938 Erpin - TATTAATCAACAAGGCGCTTAATGCGCCTTTTTTTATAGGTGG NA
16940 Both + ACCTATAAAAAAAGGCGCATTAAGCGCCTTgTTGATTAATAGTA NA
16941 Both - TTAATCAACAAGGCGCTTAATGCGCCTTTTTTTATAGG -9.90
17275 Both - GTAATATTATAGGGACTAACTTAGTTGGTCCCTTTTTTATTGGA -10.60
17433 Both + GCTTCCGGGATTTCGATGGACATATTCATCGGATTTTTTTCGTAC -7.70
18290 Both - CTATTATTGAAGCCGTGAACATAATCACGGCTTTTTTATTAAC -11.70
18291 Erpin + TTAATAAAAAAGCCGTGATTATGTTCACGGCTTCAATAATAGCA NA
19141 Both - GTTTAATATGGGGACTATCCTTTTTTTGGATAGTCCtTTTTTTATGGAGA -10.40
19700 Rnamotif + AAACGTGAATTTGGCGTAACAGGCGCGGCGTCGTTTTTCTCTTCC -4.50
20662 Both + CTCAACTCGATCGCCGTGCGGCGTTTTGTAAACCT -5.70
22840 Both - GATATAATCAAGGCTGTCAATTGACGGCCTTTTTTATTGGA -11.70
24556 Both + TACTGTCGATGCGGAAGCTGACGAGTTTTCGaTATTGATTGAGG -8.50
25069 Both - ATAAATACTAACCCGCTTCGGCGGGTTTTTTTATGCC -9.80
25070 Rnamotif + GCATAAAAAAACCCGCCGAAGCGGGTTAGTATTTATC -8.90
25529 Both - CCTGGAGAGGCCGTTATTGGTCGCATCGATGGCGTTATGATTAAGG -6.70
29005 Both - GTAATTTTAACGGGGAATCGACTCTGAGCGGTTCCCCTTTCTTTTGGAGA -12.50
35970 Both - CGAAACGCTCTCGACCTTTGTATAGGTTGTTAATTTCAAAT -6.50
38501 Both - GACGAAAAAAAGGAGGCTTAGCCTCCTTTGTTATTTGT -10.10
38502 Both + CAAATAACAAAGGAGGCTAAGCCTCCTTTTTTTCGTCC -10.10
39682 Rnamotif - ATCACCTTACAGGCTGGCATGATTTACATGCTGGCCTTTTTGCGTTGT -10.80
39939 Rnamotif + TGTGGTTACTATGCCCGAATCCCTTCGGGCGTTTTTATCAATT -11.90
41927 Both + TGAAATAACTATACCCGACTTTCGCCGGGTATTTTTAGCAATT -8.60
44708 Rnamotif - GGATCTGAATTTAGGGGCGTAGTTCCTATTCTTGTTGAGA -6.10
45645 Both - GAGCATCAAGTCGCGCTCGCAGTCCGGCGCGTGTTTCTTCTTT -9.00
45969 Erpin - CAAAATAAAAAACGCGTATAAGGATGTTAACCCGCTACGCGTcGTTTGTTTTAACT NA
45971 Both + TTAAAACAAACGACGCGTAGCGGGTTAACATCCTTATACGCGTTTTTTATTTTGGAG -9.40
46961 Rnamotif + ACCTACTCTGACCGCCTTCTGGCGGTTTTTTATTGTC -10.00
47914 Rnamotif - AGTAACTCTAATGGGGCGTCTGGCCTCAagTTTTTCCATGAT -9.40
Total number of predicted transcription terminators: 43
